# Supplementary material for: Synthesis and Effect of Conformationally Locked Carbocyclic Guanine Nucleotides on Dynamin
Source: MDPI journal article supplement (doi:10.3390/biom12040584), 2022-04-16
Supplement: s1 [file s1]

## Supplementary information

### Synthesis and Effect of Conformationally Locked Carbocyclic Guanine Nucleotides on Dynamin

Kiran S. Toti<sup>1</sup>, John R. Jimah<sup>2</sup>, Veronica Salmaso<sup>1</sup>, Jenny E. Hinshaw<sup>2</sup>, Kenneth A. Jacobson<sup>1</sup>

<sup>1</sup>Laboratory of Bioorganic Chemistry, National Institute of Diabetes and Digestive and Kidney Diseases, NIH, Bethesda, MD, USA.

<sup>2</sup>Laboratory of Cell and Molecular Biology, National Institute of Diabetes and Digestive and Kidney Diseases, NIH, Bethesda, MD, USA.

#### Table of Contents

Supplementary Figure S1

Page S1

Supplementary Figure S2

Page S2

<sup>1</sup>H, <sup>31</sup>P, HRMS and HPLC Copies of Final Compounds

Page S4-22

<sup>1</sup>H, <sup>31</sup>P, and HRMS Copies of Intermediates

Page S23-33

#### Supplementary figure S1

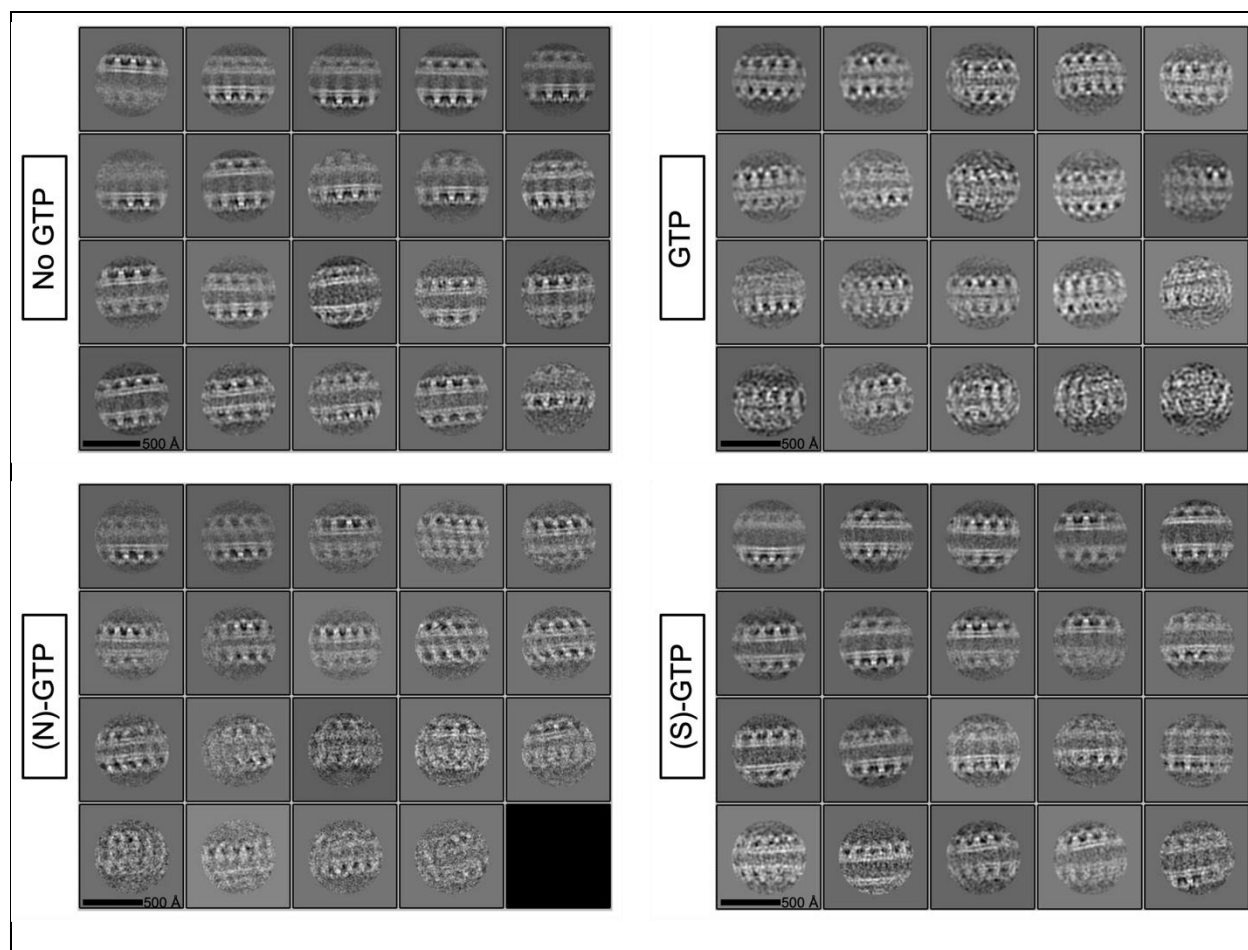

**Supplementary Figure S1.** 2D classes of cryoEM micrographs of dynamin-decorated lipid tubules without nucleotide or after treatment with GTP (Jena Biosciences Co), (N)-GTP, or (S)-GTP.

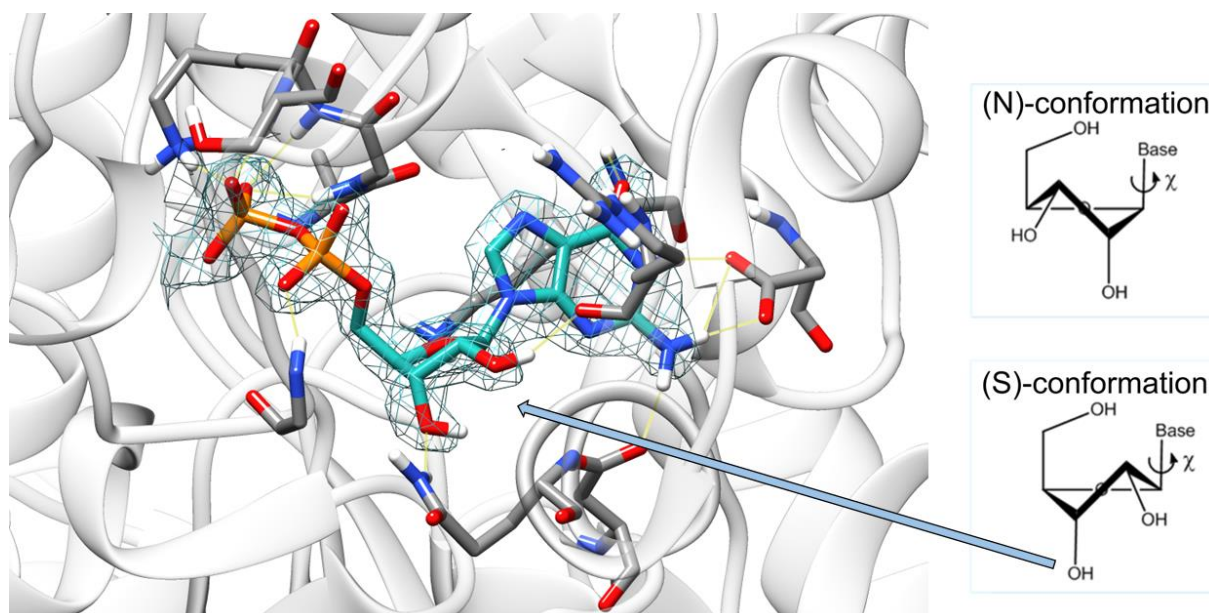

**Supplementary Figure S2.** Atomic model of dynamin (PDB ID: 2X2E) bound to GDP in South (S)- conformation with electron density shown around the ligand. Right panel shows the north and south conformations, with the south conformation in agreement with the electron density around the nucleotide in the left panel. The image was generated using the software UCSF Chimera (Pettersen, E.F., Goddard, T.D., Huang, C.C., Couch, G.S., Greenblatt, D.M., Meng, E.C., and Ferrin, T.E. UCSF Chimera - A Visualization System for Exploratory Research and Analysis. *J. Comput. Chem.* 25:1605-1612 (2004).). Selected protein residues interacting with the nucleotide (cyan) are shown in grey sticks. H-bonds were predicted after addition of hydrogens and are shown by yellow lines.

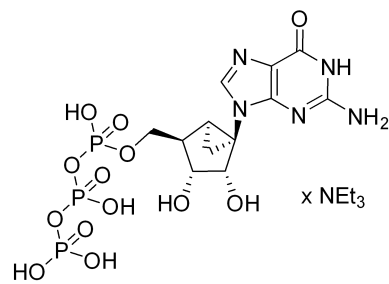

**4a:**(S)-mc-GTP; **MRS4589**

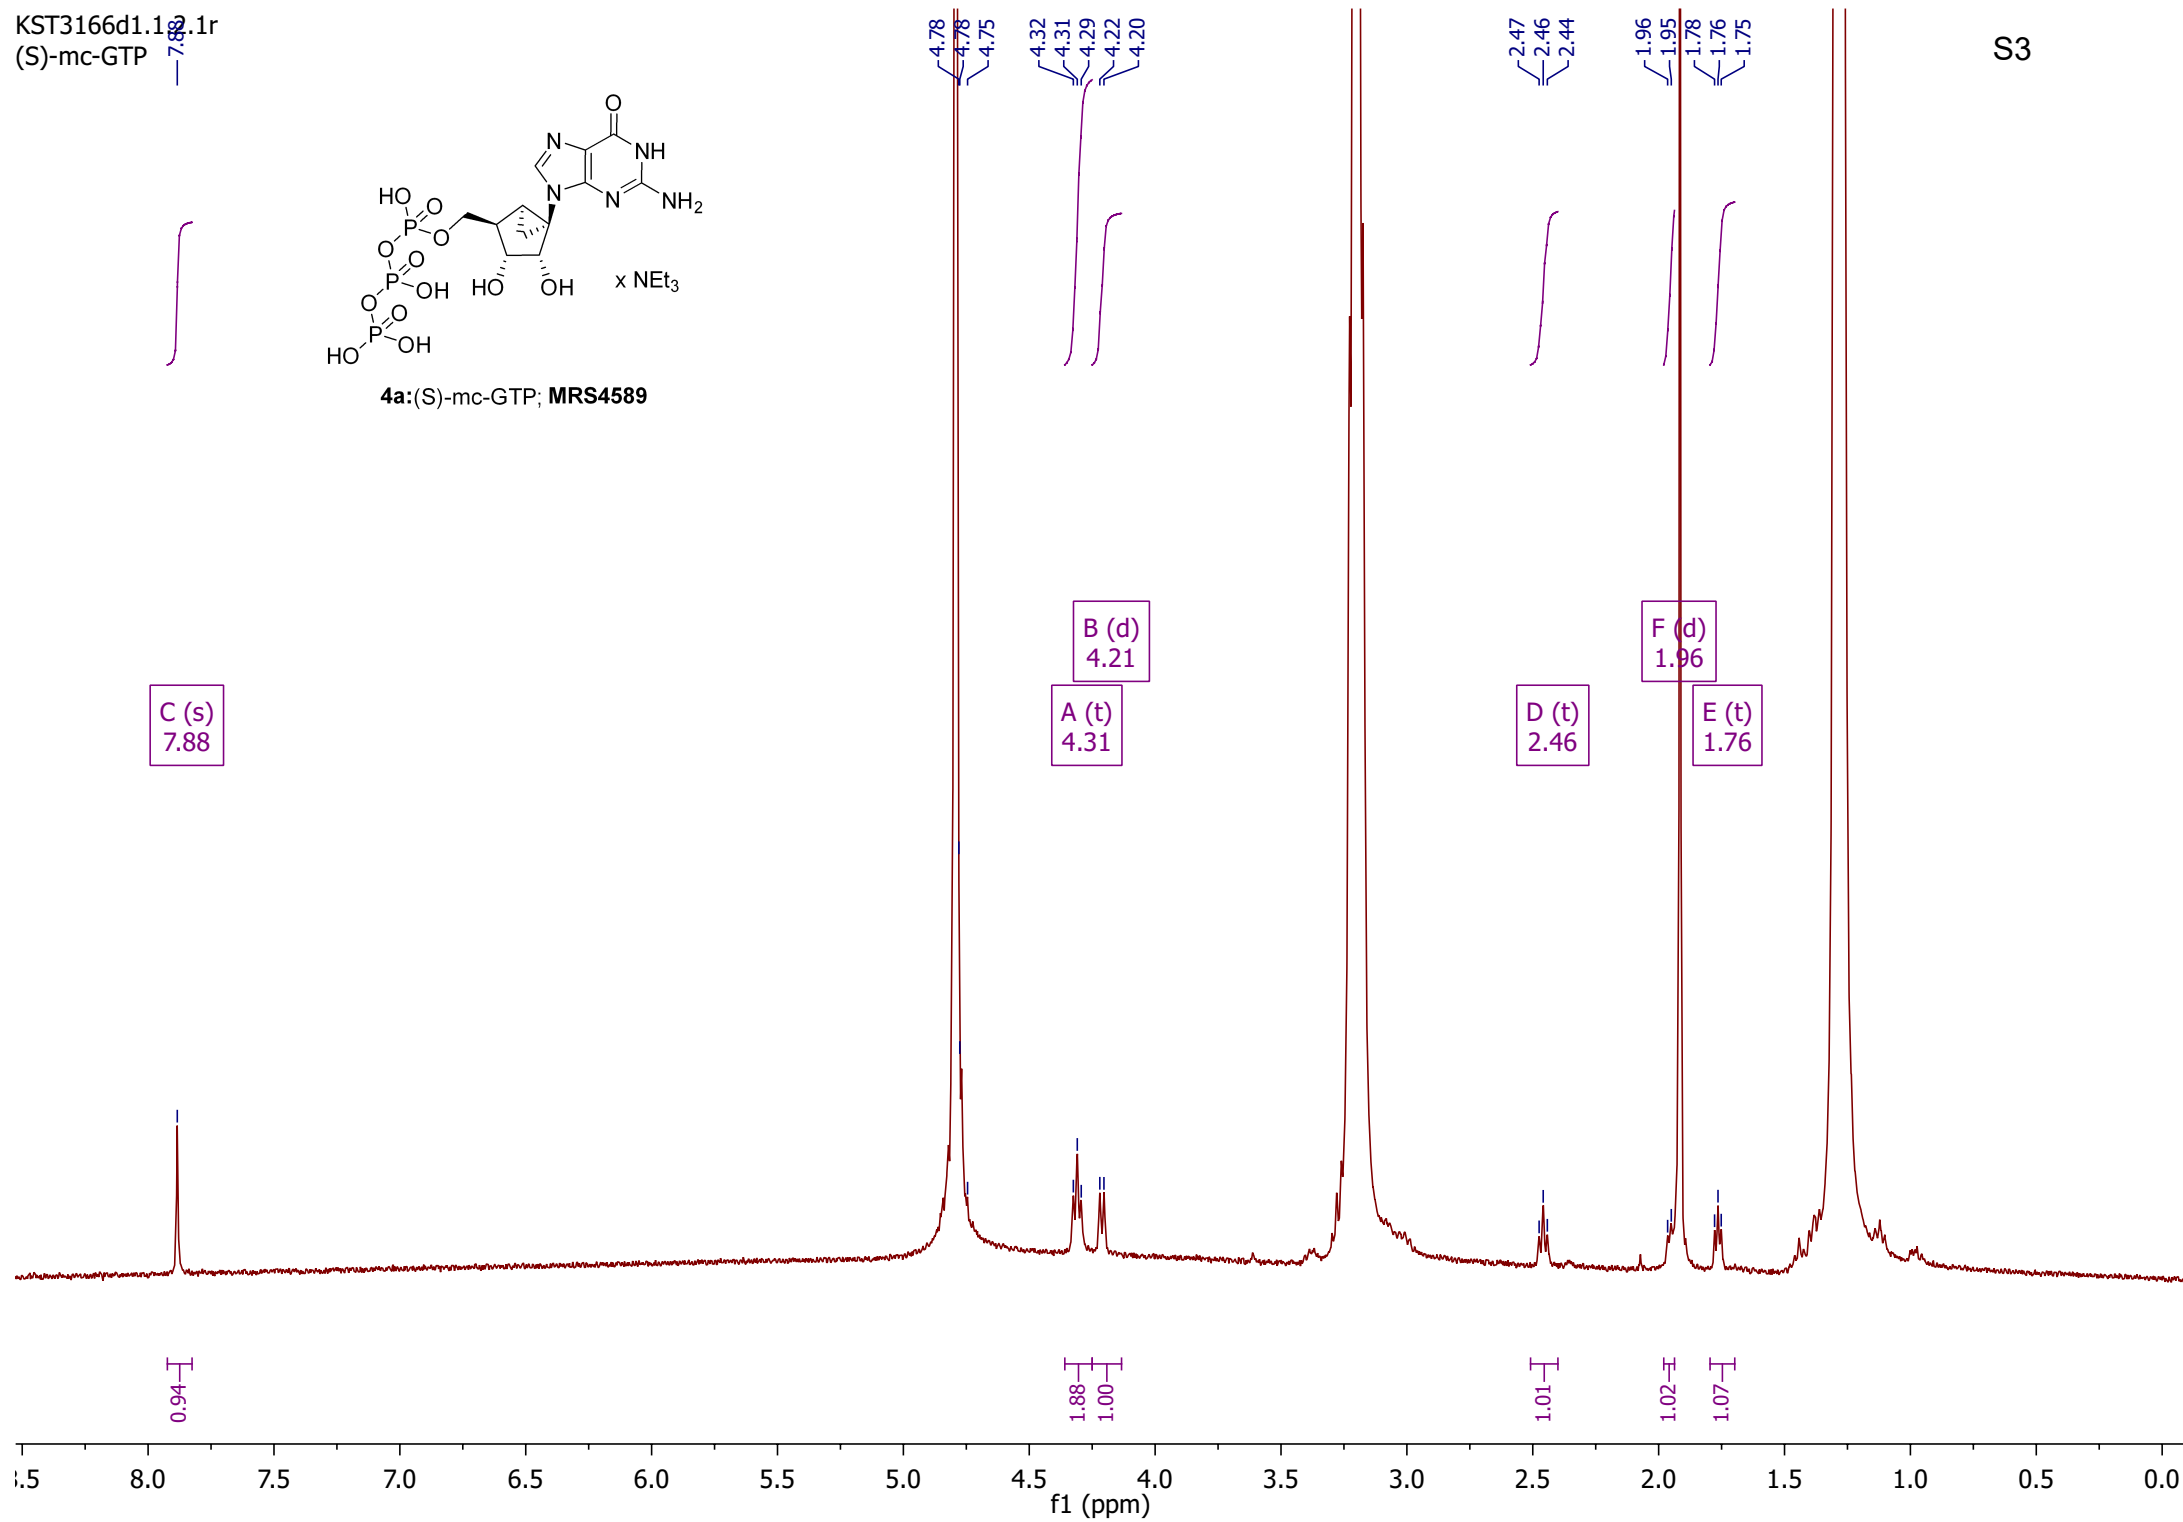

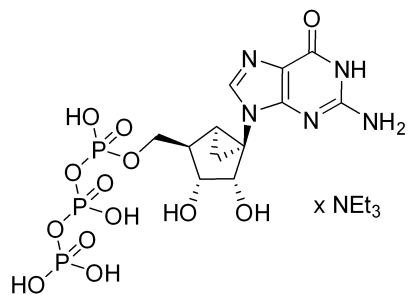

**4a:**(S)-mc-GTP; **MRS4589**

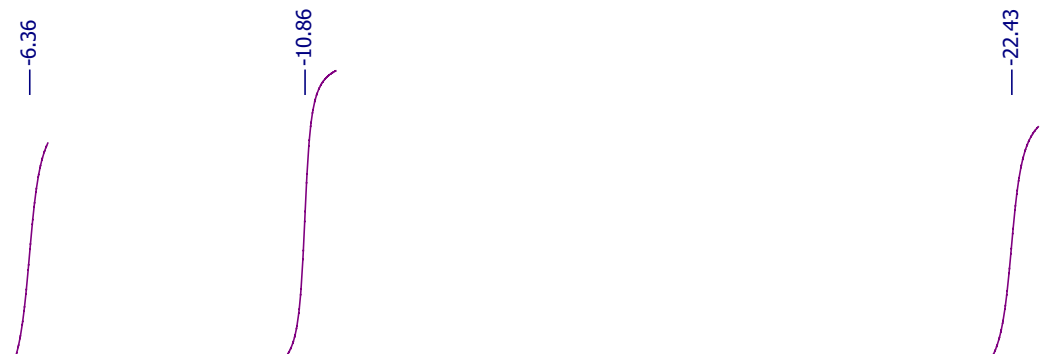

A (s)  
-6.36

B (s)  
-10.86

C (s)  
-22.43

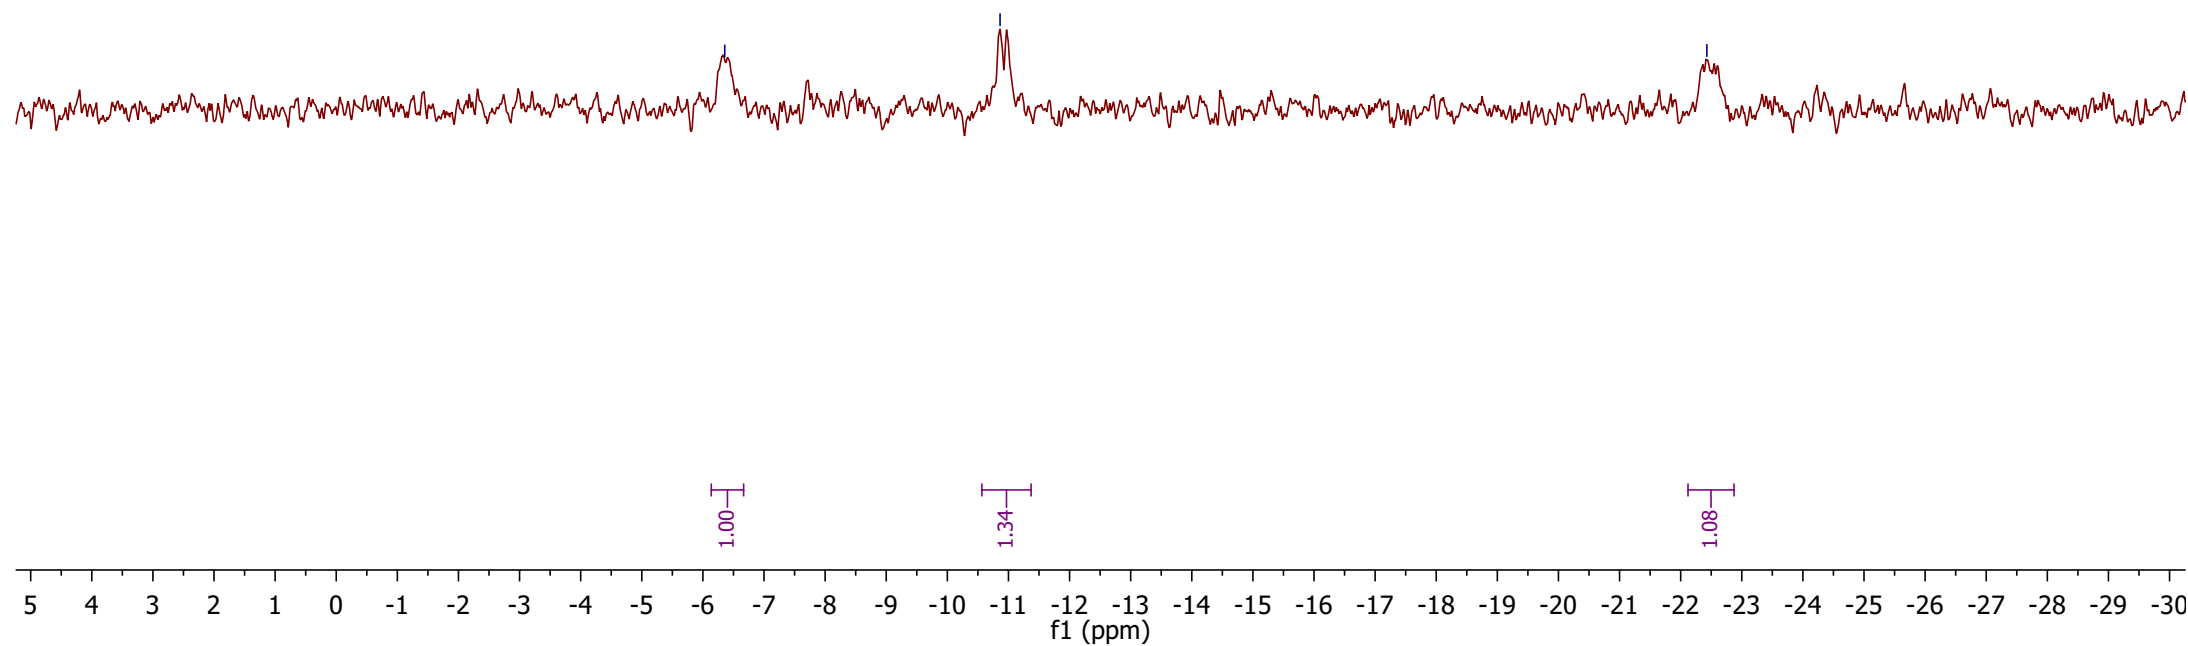

Single Mass Analysis

Tolerance = 10.0 mDa / DBE: min = -1.5, max = 100.0  
Element prediction: Off  
Number of isotope peaks used for i-FIT = 3

Monoisotopic Mass, Even Electron Ions  
89 formula(e) evaluated with 5 results within limits (up to 50 closest results for each mass)  
Elements Used:  
C: 0-200 H: 0-200 N: 5-5 O: 0-60 P: 3-3  
KST-12OCT18-3-166-D1 221 (3.755) AM2 (Ar,22000.0,0.00,0.00); ABS  
TOF MS ES-

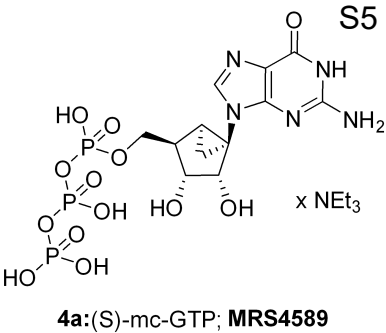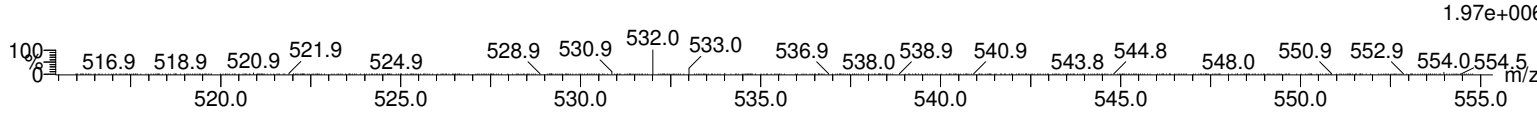

Minimum: -1.5  
Maximum: 10.0 5.0 100.0

| Mass     | Calc. Mass | mDa  | PPM   | DBE  | i-FIT | Norm  | Conf (%) | Formula           |
|----------|------------|------|-------|------|-------|-------|----------|-------------------|
| 532.0040 | 532.0036   | 0.4  | 0.8   | 8.5  | 354.7 | 1.878 | 15.29    | C12 H17 N5 O13 P3 |
|          | 532.0071   | -3.1 | -5.8  | 30.5 | 356.5 | 3.676 | 2.53     | C30 H9 N5 P3      |
|          | 532.0094   | -5.4 | -10.2 | -0.5 | 359.1 | 6.248 | 0.19     | C5 H21 N5 O18 P3  |
|          | 531.9977   | 6.3  | 11.8  | 17.5 | 353.2 | 0.313 | 73.10    | C19 H13 N5 O8 P3  |
|          | 532.0130   | -9.0 | -16.9 | 21.5 | 355.3 | 2.421 | 8.89     | C23 H13 N5 O5 P3  |

Injection Date : 10/12/2018 11:41:51 AM Seq. Line : 1  
 Sample Name : KST3166D1 Location : Vial 1  
 Acq. Operator : KIRAN Inj : 1  
 Acq. Instrument : Instrument 1 Inj Volume : 100 µl  
 Different Inj Volume from Sequence ! Actual Inj Volume : 10 µl  
 Sequence File : C:\HPCHEM\1\SEQUENCE\DEF\_LC.S  
 Method : C:\HPCHEM\1\METHODS\AN0010.M  
 Last changed : 10/12/2018 11:39:45 AM by KIRAN

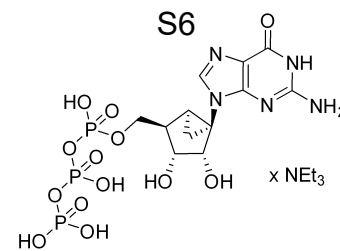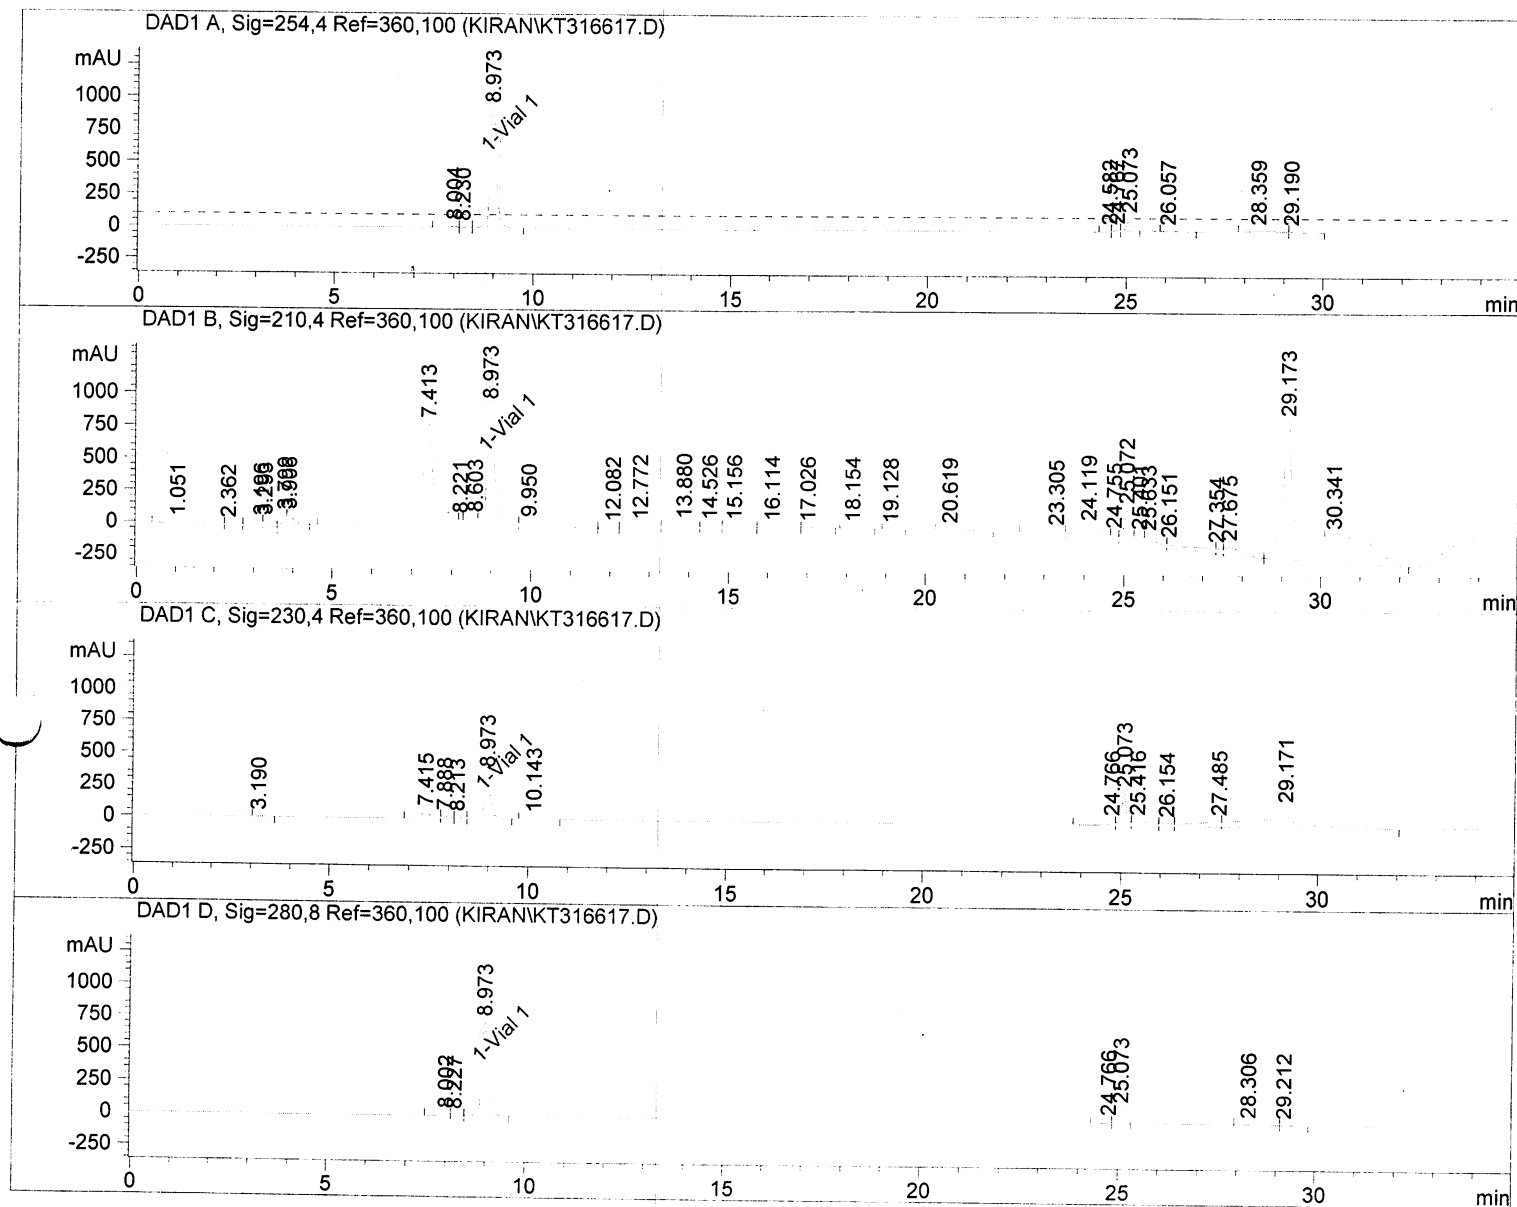

### Fraction Information

Fraction collection peak controlled  
 Maximum peak duration 4 min.  
 Fractions are collected, when at least one peak detector detects a peak

| Frac # | Well # | Location | Volume [µl] | BeginTime [min] | EndTime [min] | Reason | Mass |
|--------|--------|----------|-------------|-----------------|---------------|--------|------|
| 1      | 1      | 1-Vial 1 | 315.00      | 8.8535          | 9.1535        | DAD1   |      |

S7

=====

|                                      |                                   |                   |          |
|--------------------------------------|-----------------------------------|-------------------|----------|
| Injection Date                       | : 10/12/2018 11:41:51 AM          | Seq. Line         | : 1      |
| Sample Name                          | : KST3166D1                       | Location          | : Vial 1 |
| Acq. Operator                        | : KIRAN                           | Inj               | : 1      |
| Acq. Instrument                      | : Instrument 1                    | Inj Volume        | : 100 µl |
| Different Inj Volume from Sequence ! |                                   | Actual Inj Volume | : 10 µl  |
| Sequence File                        | : C:\HPCHEM\1\SEQUENCE\DEF_LC.S   |                   |          |
| Method                               | : C:\HPCHEM\1\METHODS\AN0010.M    |                   |          |
| Last changed                         | : 10/12/2018 11:39:45 AM by KIRAN |                   |          |

=====

=====

Area Percent Report

=====

Sorted By : Signal  
Multiplier : 1.0000  
Dilution : 1.0000  
Use Multiplier & Dilution Factor with ISTDs

Signal 1: DAD1 A, Sig=254,4 Ref=360,100

| Peak # | RetTime [min] | Type | Width [min] | Area [mAU*s] | Height [mAU] | Area %  |
|--------|---------------|------|-------------|--------------|--------------|---------|
| 1      | 8.004         | BV   | 0.1944      | 178.33264    | 12.06954     | 1.4326  |
| 2      | 8.230         | VV   | 0.1765      | 78.80063     | 6.27470      | 0.6330  |
| 3      | 8.973         | VB   | 0.1490      | 1.07524e4    | 1072.57935   | 86.3758 |
| 4      | 24.582        | PV   | 0.1047      | 26.25638     | 3.89373      | 0.2109  |
| 5      | 24.767        | VV   | 0.1384      | 108.12511    | 11.63821     | 0.8686  |
| 6      | 25.073        | VB   | 0.1119      | 806.14734    | 96.02168     | 6.4759  |
| 7      | 26.057        | PP   | 0.1155      | 16.06891     | 1.92265      | 0.1291  |
| 8      | 28.359        | BV   | 0.6816      | 389.92679    | 7.08992      | 3.1323  |
| 9      | 29.190        | VP   | 0.1805      | 92.33832     | 6.46844      | 0.7418  |

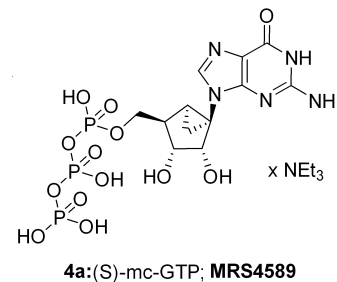

Totals : 1.24484e4 1217.95821

Results obtained with enhanced integrator!

Signal 2: DAD1 B, Sig=210,4 Ref=360,100

| Peak # | RetTime [min] | Type | Width [min] | Area [mAU*s] | Height [mAU] | Area %  |
|--------|---------------|------|-------------|--------------|--------------|---------|
| 1      | 1.051         | BV   | 1.2755      | 1053.19910   | 9.67898      | 0.9748  |
| 2      | 2.362         | VV   | 0.3122      | 399.98389    | 16.19422     | 0.3702  |
| 3      | 3.196         | VV   | 0.2157      | 678.86737    | 41.31947     | 0.6284  |
| 4      | 3.293         | VP   | 0.1792      | 499.81091    | 43.79323     | 0.4626  |
| 5      | 3.799         | VV   | 0.1275      | 703.60803    | 85.94725     | 0.6513  |
| 6      | 3.906         | VB   | 0.1812      | 1120.33972   | 85.34208     | 1.0370  |
| 7      | 7.413         | BV   | 0.3150      | 1.83728e4    | 785.15985    | 17.0056 |
| 8      | 8.221         | VV   | 0.0980      | 369.49396    | 52.54774     | 0.3420  |
| 9      | 8.603         | VV   | 0.2689      | 1302.48047   | 64.14443     | 1.2056  |
| 10     | 8.973         | VB   | 0.1714      | 1.55210e4    | 1318.22083   | 14.3661 |
| 11     | 9.950         | BP   | 0.8075      | 2035.59729   | 34.04876     | 1.8841  |
| 12     | 12.082        | BV   | 0.2960      | 111.09353    | 5.22539      | 0.1028  |
| 13     | 12.772        | VV   | 0.6710      | 1036.44153   | 21.03090     | 0.9593  |
| 14     | 13.880        | VV   | 0.6705      | 1382.46875   | 28.57165     | 1.2796  |
| 15     | 14.526        | VV   | 0.4392      | 641.40985    | 20.95223     | 0.5937  |
| 16     | 15.156        | VV   | 0.5831      | 818.55542    | 19.13401     | 0.7576  |
| 17     | 16.114        | VV   | 0.6761      | 606.97870    | 10.69572     | 0.5618  |
| 18     | 17.026        | VB   | 0.3338      | 151.47769    | 5.97445      | 0.1402  |
| 19     | 18.154        | BP   | 0.3066      | 94.69833     | 4.51742      | 0.0877  |
| 20     | 19.128        | PP   | 0.1870      | 21.72026     | 1.77249      | 0.0201  |
| 21     | 20.619        | BB   | 0.5100      | 323.05261    | 8.56620      | 0.2990  |
| 22     | 23.305        | BV   | 0.5217      | 1485.85413   | 34.69229     | 1.3753  |
| 23     | 24.119        | VV   | 0.7218      | 4939.60937   | 97.70393     | 4.5720  |
| 24     | 24.755        | VV   | 0.1529      | 688.27863    | 59.54269     | 0.6371  |
| 25     | 25.072        | VV   | 0.1344      | 2663.80298   | 258.02444    | 2.4656  |

Injection Date : 10/12/2018 11:41:51 AM Seq. Line : 1  
Sample Name : KST3166D1 Location : Vial 1  
Acq. Operator : KIRAN Inj : 1  
Acq. Instrument : Instrument 1 Inj Volume : 100 µl  
Different Inj Volume from Sequence ! Actual Inj Volume : 10 µl  
Sequence File : C:\HPCHEM\1\SEQUENCE\DEF\_LC.S  
Method : C:\HPCHEM\1\METHODS\AN0010.M  
Last changed : 10/12/2018 11:39:45 AM by KIRAN

S8

| Peak # | RetTime [min] | Type | Width [min] | Area [mAU*s] | Height [mAU] | Area %  |
|--------|---------------|------|-------------|--------------|--------------|---------|
| 26     | 25.401        | VV   | 0.2064      | 1085.79285   | 72.63398     | 1.0050  |
| 27     | 25.633        | VV   | 0.2698      | 1513.61853   | 71.85312     | 1.4010  |
| 28     | 26.151        | VV   | 0.7176      | 2061.90576   | 34.48144     | 1.9085  |
| 29     | 27.354        | VV   | 0.1498      | 377.64221    | 33.44045     | 0.3495  |
| 30     | 27.675        | VP   | 0.3395      | 1446.68762   | 58.30543     | 1.3390  |
| 31     | 29.173        | VV   | 0.3102      | 2.73315e4    | 1091.30774   | 25.2977 |
| 32     | 30.341        | VP   | 1.0418      | 1.71996e4    | 208.19081    | 15.9198 |

Totals : 1.08039e5 4683.01363

Results obtained with enhanced integrator!

Signal 3: DAD1 C, Sig=230,4 Ref=360,100

| Peak # | RetTime [min] | Type | Width [min] | Area [mAU*s] | Height [mAU] | Area %  |
|--------|---------------|------|-------------|--------------|--------------|---------|
| 1      | 3.190         | BP   | 0.2466      | 47.67048     | 2.49825      | 0.2235  |
| 2      | 7.415         | BV   | 0.2809      | 1006.69507   | 48.34402     | 4.7208  |
| 3      | 7.888         | VV   | 0.2049      | 242.66095    | 16.00676     | 1.1379  |
| 4      | 8.213         | VV   | 0.2031      | 104.67621    | 6.82017      | 0.4909  |
| 5      | 8.973         | VB   | 0.1519      | 3624.17065   | 352.50552    | 16.9951 |
| 6      | 10.143        | PB   | 0.3970      | 92.21033     | 3.11796      | 0.4324  |
| 7      | 24.766        | BV   | 0.2197      | 492.60123    | 28.49256     | 2.3100  |
| 8      | 25.073        | VV   | 0.1159      | 2184.98828   | 250.13223    | 10.2463 |
| 9      | 25.416        | VV   | 0.4564      | 1169.18787   | 33.73066     | 5.4828  |
| 10     | 26.154        | VV   | 0.2780      | 527.96765    | 23.87681     | 2.4758  |
| 11     | 27.485        | VV   | 0.6339      | 2147.03711   | 40.93493     | 10.0683 |
| 12     | 29.171        | VB   | 0.7813      | 9684.87988   | 147.64188    | 45.4162 |

Totals : 2.13247e4 954.10175

Results obtained with enhanced integrator!

Signal 4: DAD1 D, Sig=280,8 Ref=360,100

| Peak # | RetTime [min] | Type | Width [min] | Area [mAU*s] | Height [mAU] | Area %  |
|--------|---------------|------|-------------|--------------|--------------|---------|
| 1      | 8.002         | BV   | 0.2149      | 142.85364    | 8.55327      | 1.7007  |
| 2      | 8.227         | VV   | 0.1696      | 56.37685     | 4.58135      | 0.6712  |
| 3      | 8.973         | VB   | 0.1481      | 7175.03223   | 720.93640    | 85.4184 |
| 4      | 24.766        | PV   | 0.1413      | 85.92663     | 9.00814      | 1.0230  |
| 5      | 25.073        | VB   | 0.1035      | 792.15314    | 103.26379    | 9.4305  |
| 6      | 28.306        | BP   | 0.4608      | 111.32475    | 2.98734      | 1.3253  |
| 7      | 29.212        | VB   | 0.2074      | 36.19797     | 2.18374      | 0.4309  |

Totals : 8399.86519 851.51404

Results obtained with enhanced integrator!

Summed Peaks Report

Signal 1: DAD1 A, Sig=254,4 Ref=360,100



```
=====
Injection Date   : 10/12/2018 11:41:51 AM      Seq. Line :    1
Sample Name     : KST3166D1                   Location  : Vial 1
Acq. Operator   : KIRAN                       Inj       :    1
Acq. Instrument : Instrument 1                 Inj Volume: 100 µl
Different Inj Volume from Sequence !          Actual Inj Volume : 10 µl
Sequence File   : C:\HPCHEM\1\SEQUENCE\DEF_LC.S
Method          : C:\HPCHEM\1\METHODS\AN0010.M
Last changed    : 10/12/2018 11:39:45 AM by KIRAN
=====
```

S9

```
Signal 2: DAD1 B, Sig=210,4 Ref=360,100
Signal 3: DAD1 C, Sig=230,4 Ref=360,100
Signal 4: DAD1 D, Sig=280,8 Ref=360,100
=====
```

```
=====
                          Final Summed Peaks Report
=====
```

```
Signal 1: DAD1 A, Sig=254,4 Ref=360,100
Signal 2: DAD1 B, Sig=210,4 Ref=360,100
Signal 3: DAD1 C, Sig=230,4 Ref=360,100
Signal 4: DAD1 D, Sig=280,8 Ref=360,100
```

```
*** End of Report ***
```

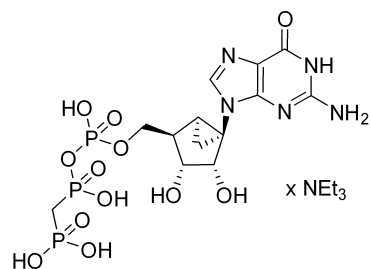

**4b**:  $\beta$ -Me-(S)-mc-GTP; **MRS4591**

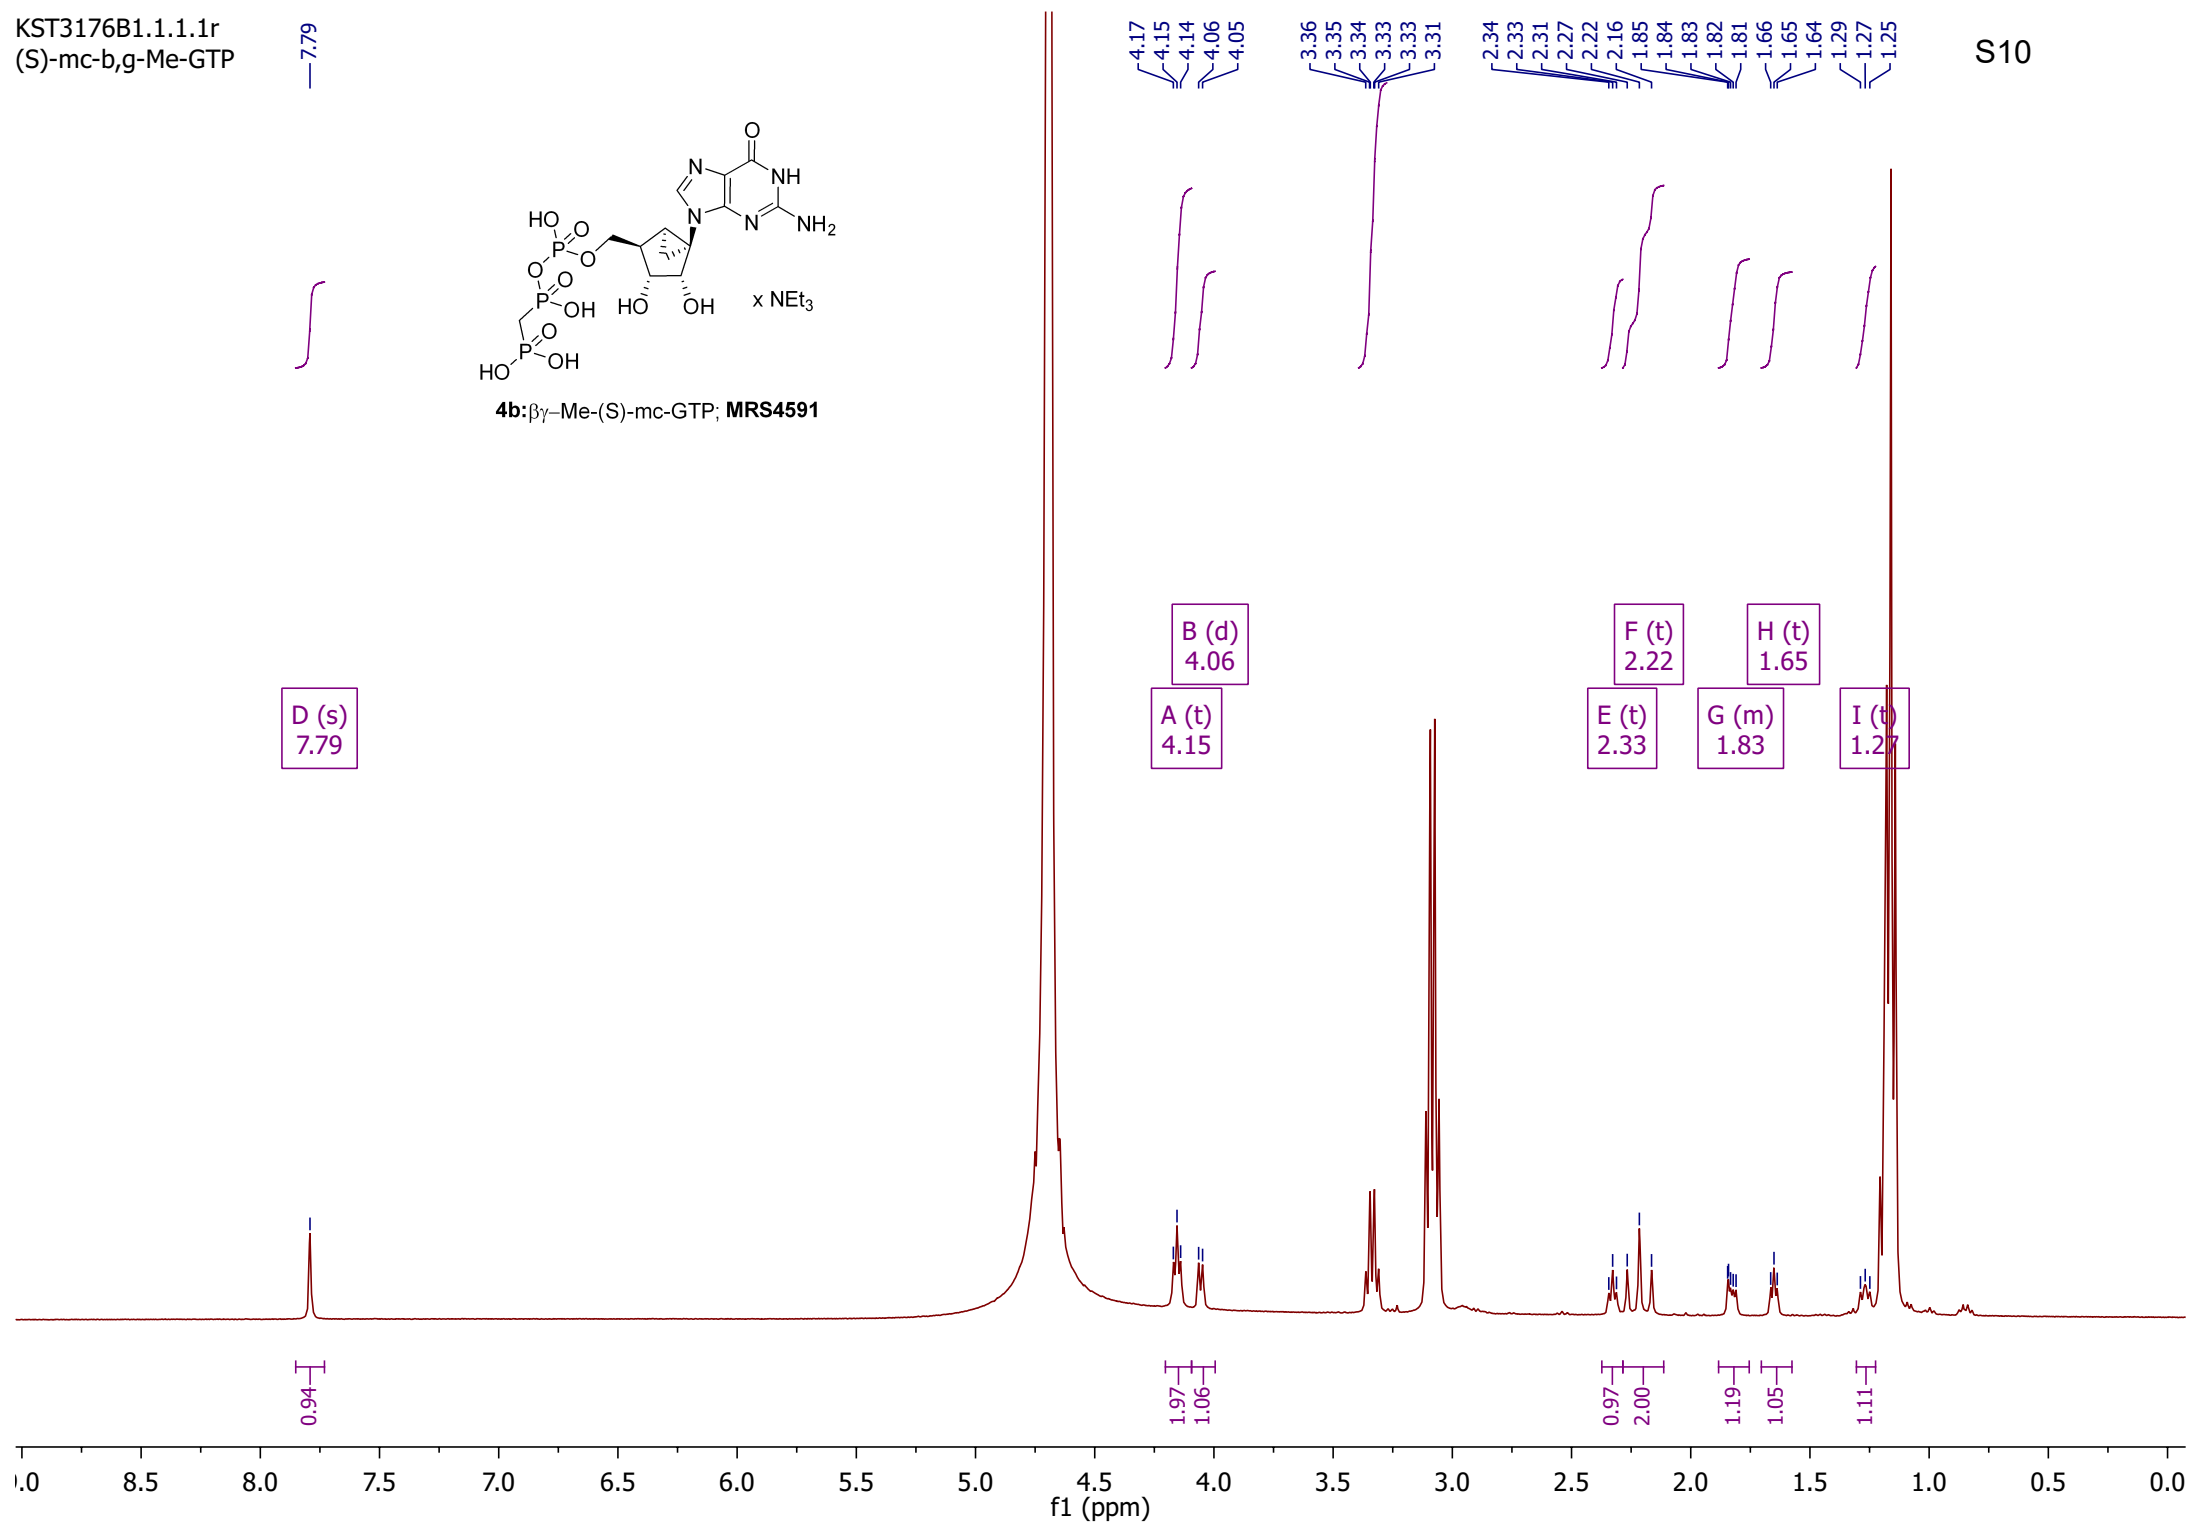

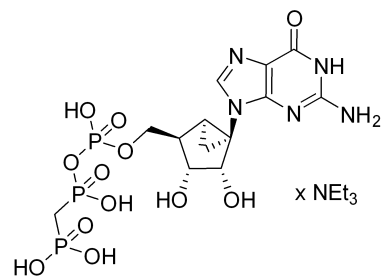

4b:  $\beta\gamma$ -Me-(S)-mc-GTP; MRS4591

14.56  
14.51

8.34  
8.29  
8.17  
8.12

-10.79  
-10.95

A (d)  
14.54

B (dd)  
8.23

C (d)  
-10.87

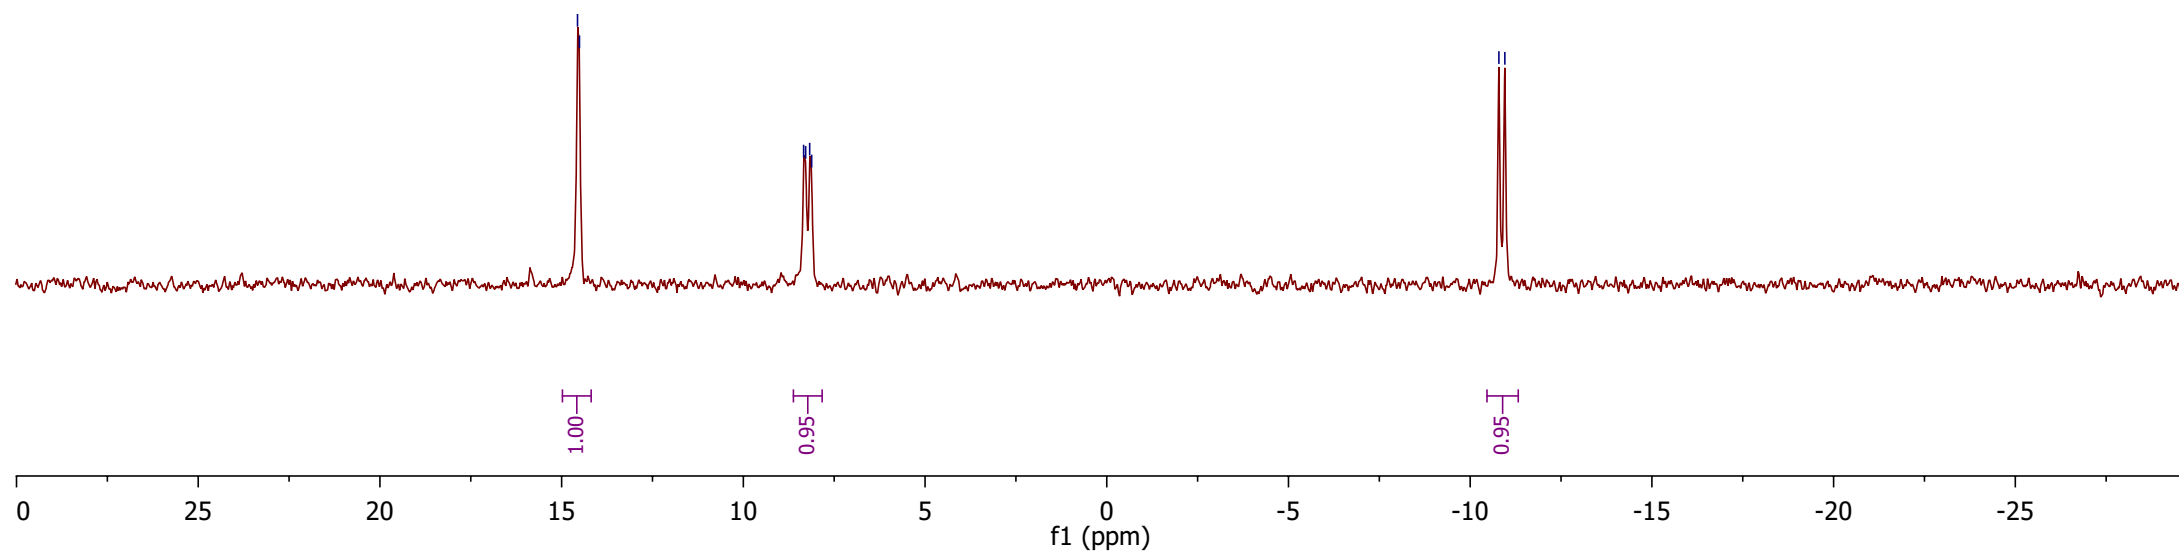

Single Mass Analysis

Tolerance = 5.0 mDa / DBE: min = -1.5, max = 100.0

Element prediction: Off

Number of isotope peaks used for i-FIT = 3

Monoisotopic Mass, Even Electron Ions

91 formula(e) evaluated with 1 results within limits (up to 50 closest results for each mass)

Elements Used:

C: 0-150 H: 0-200 N: 5-5 O: 0-60 P: 3-3

KST-16NOV18-3-176-B 145 (2.470) AM2 (Ar,22000.0,0.00,0.00); ABS

TOF MS ES-

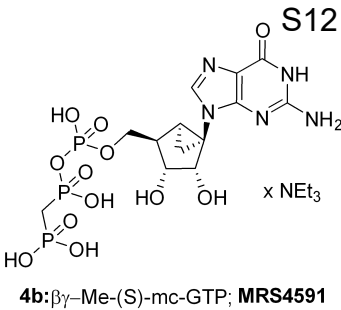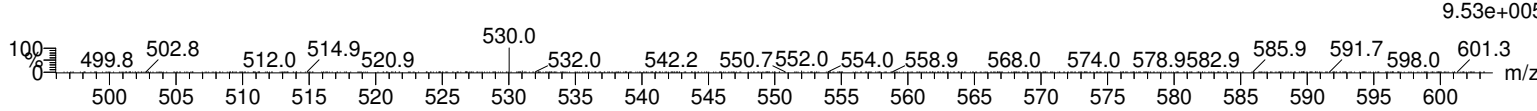

|          |     |     |       |
|----------|-----|-----|-------|
| Minimum: |     |     | -1.5  |
| Maximum: | 5.0 | 5.0 | 100.0 |

| Mass     | Calc. Mass | mDa | PPM | DBE | i-FIT | Norm | Conf (%) | Formula           |
|----------|------------|-----|-----|-----|-------|------|----------|-------------------|
| 530.0250 | 530.0243   | 0.7 | 1.3 | 8.5 | 176.6 | n/a  | n/a      | C13 H19 N5 O12 P3 |

Injection Date : 11/21/2018 2:17:21 PM Seq. Line : 2  
Sample Name : MRS4591 Location : Vial 2  
Acq. Operator : KIRAN Inj : 1  
Acq. Instrument : Instrument 1 Inj Volume : 100 µl  
Different Inj Volume from Sequence ! Actual Inj Volume : 10 µl  
Sequence File : C:\HPCHEM\1\SEQUENCE\DEF\_LC.S  
Method : C:\HPCHEM\1\METHODS\AN0015.M  
Last changed : 11/21/2018 1:33:42 PM by KIRAN

S13 3176b1

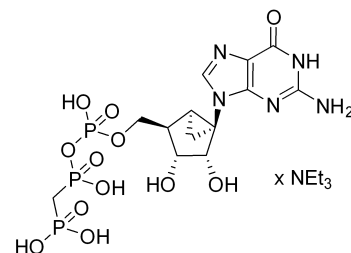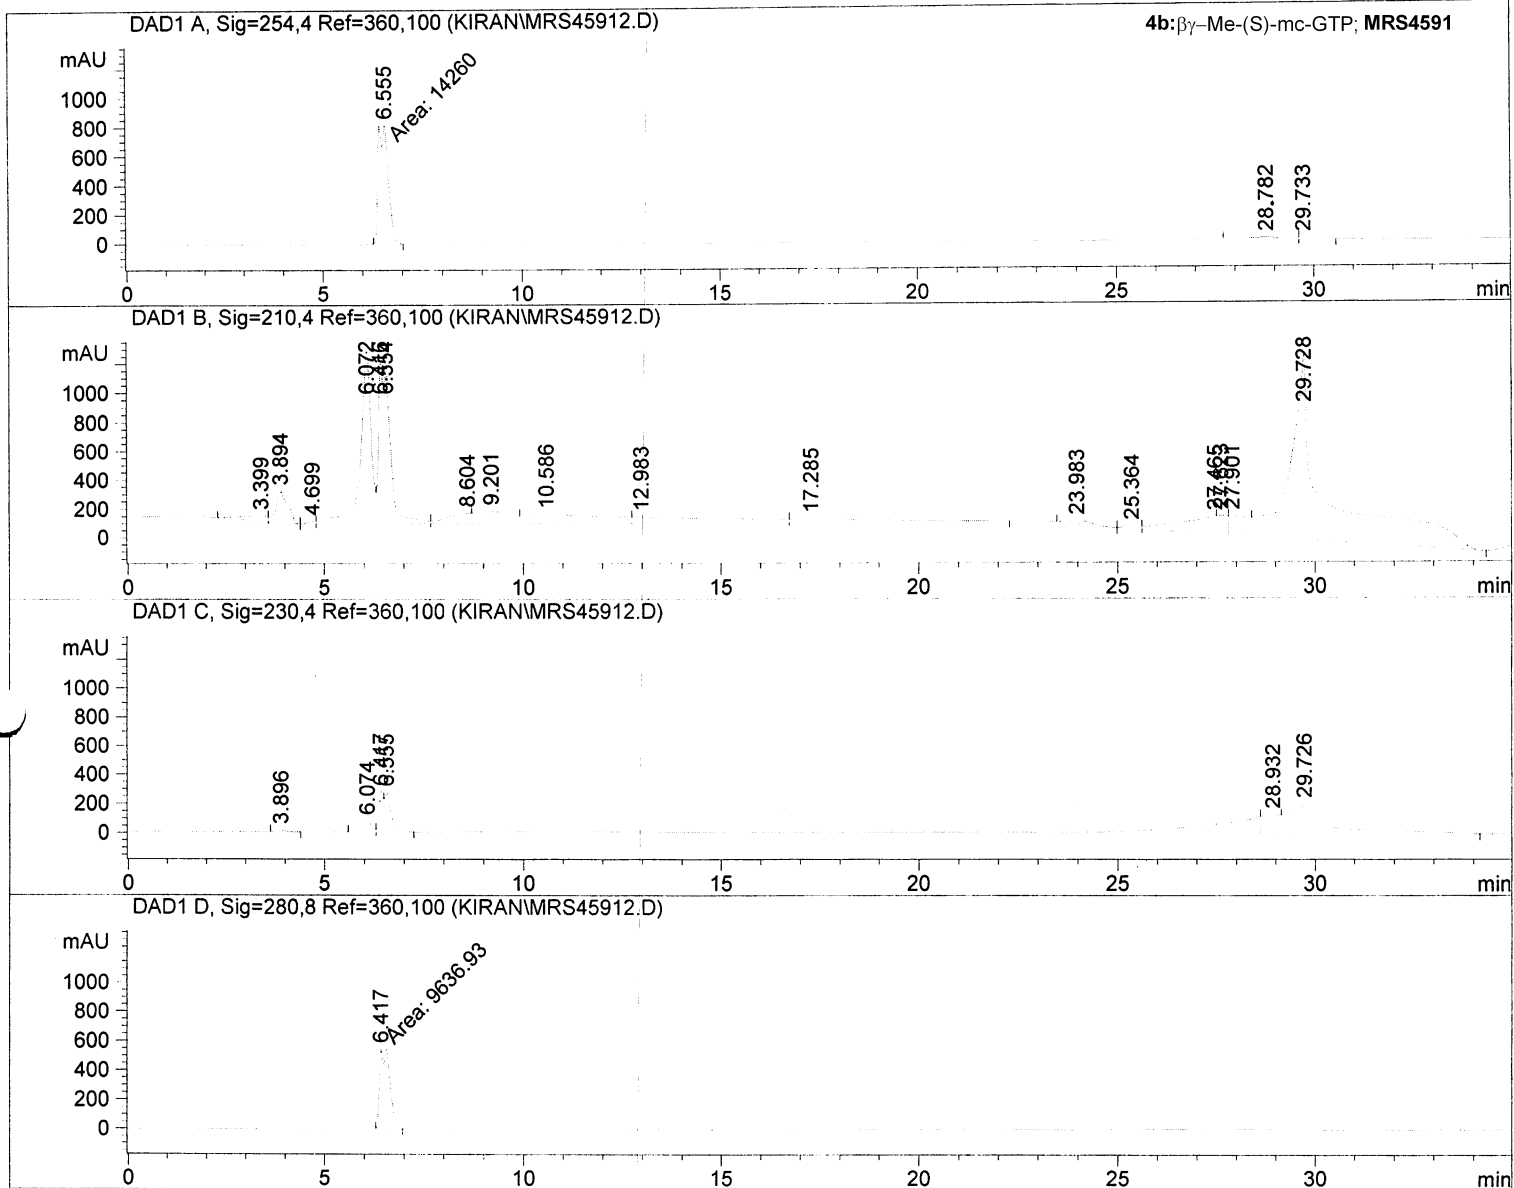

## Fraction Information

Fraction collection off

No Fractions found.

S14

```

=====
Injection Date   : 11/21/2018 2:17:21 PM      Seq. Line :    2
Sample Name     : MRS4591                    Location  : Vial 2
Acq. Operator   : KIRAN                      Inj       :    1
Acq. Instrument : Instrument 1                Inj Volume: 100 µl
Different Inj Volume from Sequence !      Actual Inj Volume : 10 µl
Sequence File   : C:\HPCHEM\1\SEQUENCE\DEF_LC.S
Method          : C:\HPCHEM\1\METHODS\AN0015.M
Last changed    : 11/21/2018 1:33:42 PM by KIRAN
=====

```

```

=====
                          Area Percent Report
=====

```

```

Sorted By           :      Signal
Multiplier          :      1.0000
Dilution            :      1.0000
Use Multiplier & Dilution Factor with ISTDs

```

Signal 1: DAD1 A, Sig=254,4 Ref=360,100

| Peak # | RetTime [min] | Type | Width [min] | Area [mAU*s] | Height [mAU] | Area %  |
|--------|---------------|------|-------------|--------------|--------------|---------|
| 1      | 6.555         | MM   | 0.2904      | 1.42600e4    | 818.36975    | 94.4012 |
| 2      | 28.782        | BV   | 0.9348      | 718.69122    | 9.65122      | 4.7577  |
| 3      | 29.733        | VB   | 0.1986      | 127.04724    | 8.11655      | 0.8411  |

Totals : 1.51057e4 836.13752

Results obtained with enhanced integrator!

Signal 2: DAD1 B, Sig=210,4 Ref=360,100

| Peak # | RetTime [min] | Type | Width [min] | Area [mAU*s] | Height [mAU] | Area %  |
|--------|---------------|------|-------------|--------------|--------------|---------|
| 1      | 3.399         | BV   | 0.5628      | 1602.12988   | 35.88866     | 0.9138  |
| 2      | 3.894         | VP   | 0.2808      | 4383.15674   | 214.17645    | 2.5000  |
| 3      | 4.699         | VV   | 0.2085      | 237.16504    | 17.46136     | 0.1353  |
| 4      | 6.072         | VV   | 0.2642      | 2.19262e4    | 1194.29504   | 12.5058 |
| 5      | 6.416         | VV   | 0.1057      | 8280.60059   | 1126.78357   | 4.7229  |
| 6      | 6.554         | VB   | 0.1711      | 1.39519e4    | 1091.77954   | 7.9576  |
| 7      | 8.604         | BV   | 0.6387      | 2982.06030   | 70.90079     | 1.7008  |
| 8      | 9.201         | VV   | 0.8960      | 5212.57471   | 84.45751     | 2.9730  |
| 9      | 10.586        | VV   | 1.7569      | 8577.17285   | 58.76177     | 4.8921  |
| 10     | 12.983        | VV   | 2.0944      | 7242.05127   | 40.76911     | 4.1306  |
| 11     | 17.285        | VB   | 2.0528      | 3887.98364   | 22.46917     | 2.2175  |
| 12     | 23.983        | BP   | 0.6300      | 861.73468    | 22.04852     | 0.4915  |
| 13     | 25.364        | VV   | 0.3450      | 561.61230    | 20.66940     | 0.3203  |
| 14     | 27.465        | VV   | 0.7445      | 7544.31592   | 122.49615    | 4.3030  |
| 15     | 27.623        | VV   | 0.2421      | 2364.59595   | 132.56717    | 1.3487  |
| 16     | 27.901        | VV   | 0.4293      | 4564.24609   | 133.34140    | 2.6033  |
| 17     | 29.728        | VP   | 0.7617      | 8.11487e4    | 1273.03931   | 46.2839 |

Totals : 1.75328e5 5661.90492

Results obtained with enhanced integrator!

Signal 3: DAD1 C, Sig=230,4 Ref=360,100

| Peak # | RetTime [min] | Type | Width [min] | Area [mAU*s] | Height [mAU] | Area %  |
|--------|---------------|------|-------------|--------------|--------------|---------|
| 1      | 3.896         | BP   | 0.2577      | 203.73988    | 11.12093     | 0.9449  |
| 2      | 6.074         | BV   | 0.2143      | 1142.51746   | 76.46857     | 5.2988  |
| 3      | 6.417         | VV   | 0.0983      | 1889.19141   | 274.59308    | 8.7618  |
| 4      | 6.555         | VB   | 0.1482      | 2921.80396   | 270.08423    | 13.5509 |

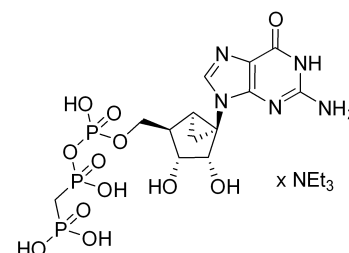

4b:βγ-Me-(S)-mc-GTP; MRS4591

S15

```
=====
Injection Date   : 11/21/2018 2:17:21 PM      Seq. Line :    2
Sample Name     : MRS4591                    Location  : Vial 2
Acq. Operator   : KIRAN                      Inj       :    1
Acq. Instrument : Instrument 1                Inj Volume: 100 µl
Different Inj Volume from Sequence !          Actual Inj Volume : 10 µl
Sequence File   : C:\HPCHEM\1\SEQUENCE\DEF_LC.S
Method          : C:\HPCHEM\1\METHODS\AN0015.M
Last changed    : 11/21/2018 1:33:42 PM by KIRAN
=====
```

| Peak # | RetTime [min] | Type | Width [min] | Area [mAU*s] | Height [mAU] | Area %  |
|--------|---------------|------|-------------|--------------|--------------|---------|
| 5      | 28.932        | BV   | 0.4953      | 3888.25562   | 124.19200    | 18.0331 |
| 6      | 29.726        | VB   | 0.6947      | 1.15163e4    | 198.55765    | 53.4106 |

Totals : 2.15618e4 955.01646

Results obtained with enhanced integrator!

Signal 4: DAD1 D, Sig=280,8 Ref=360,100

| Peak # | RetTime [min] | Type | Width [min] | Area [mAU*s] | Height [mAU] | Area %   |
|--------|---------------|------|-------------|--------------|--------------|----------|
| 1      | 6.417         | MM   | 0.2911      | 9636.93262   | 551.71722    | 100.0000 |

Totals : 9636.93262 551.71722

Results obtained with enhanced integrator!

=====

Summed Peaks Report

=====

Signal 1: DAD1 A, Sig=254,4 Ref=360,100  
Signal 2: DAD1 B, Sig=210,4 Ref=360,100  
Signal 3: DAD1 C, Sig=230,4 Ref=360,100  
Signal 4: DAD1 D, Sig=280,8 Ref=360,100

=====

Final Summed Peaks Report

=====

Signal 1: DAD1 A, Sig=254,4 Ref=360,100  
Signal 2: DAD1 B, Sig=210,4 Ref=360,100  
Signal 3: DAD1 C, Sig=230,4 Ref=360,100  
Signal 4: DAD1 D, Sig=280,8 Ref=360,100

\*\*\* End of Report \*\*\*

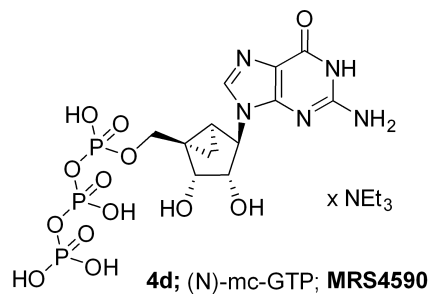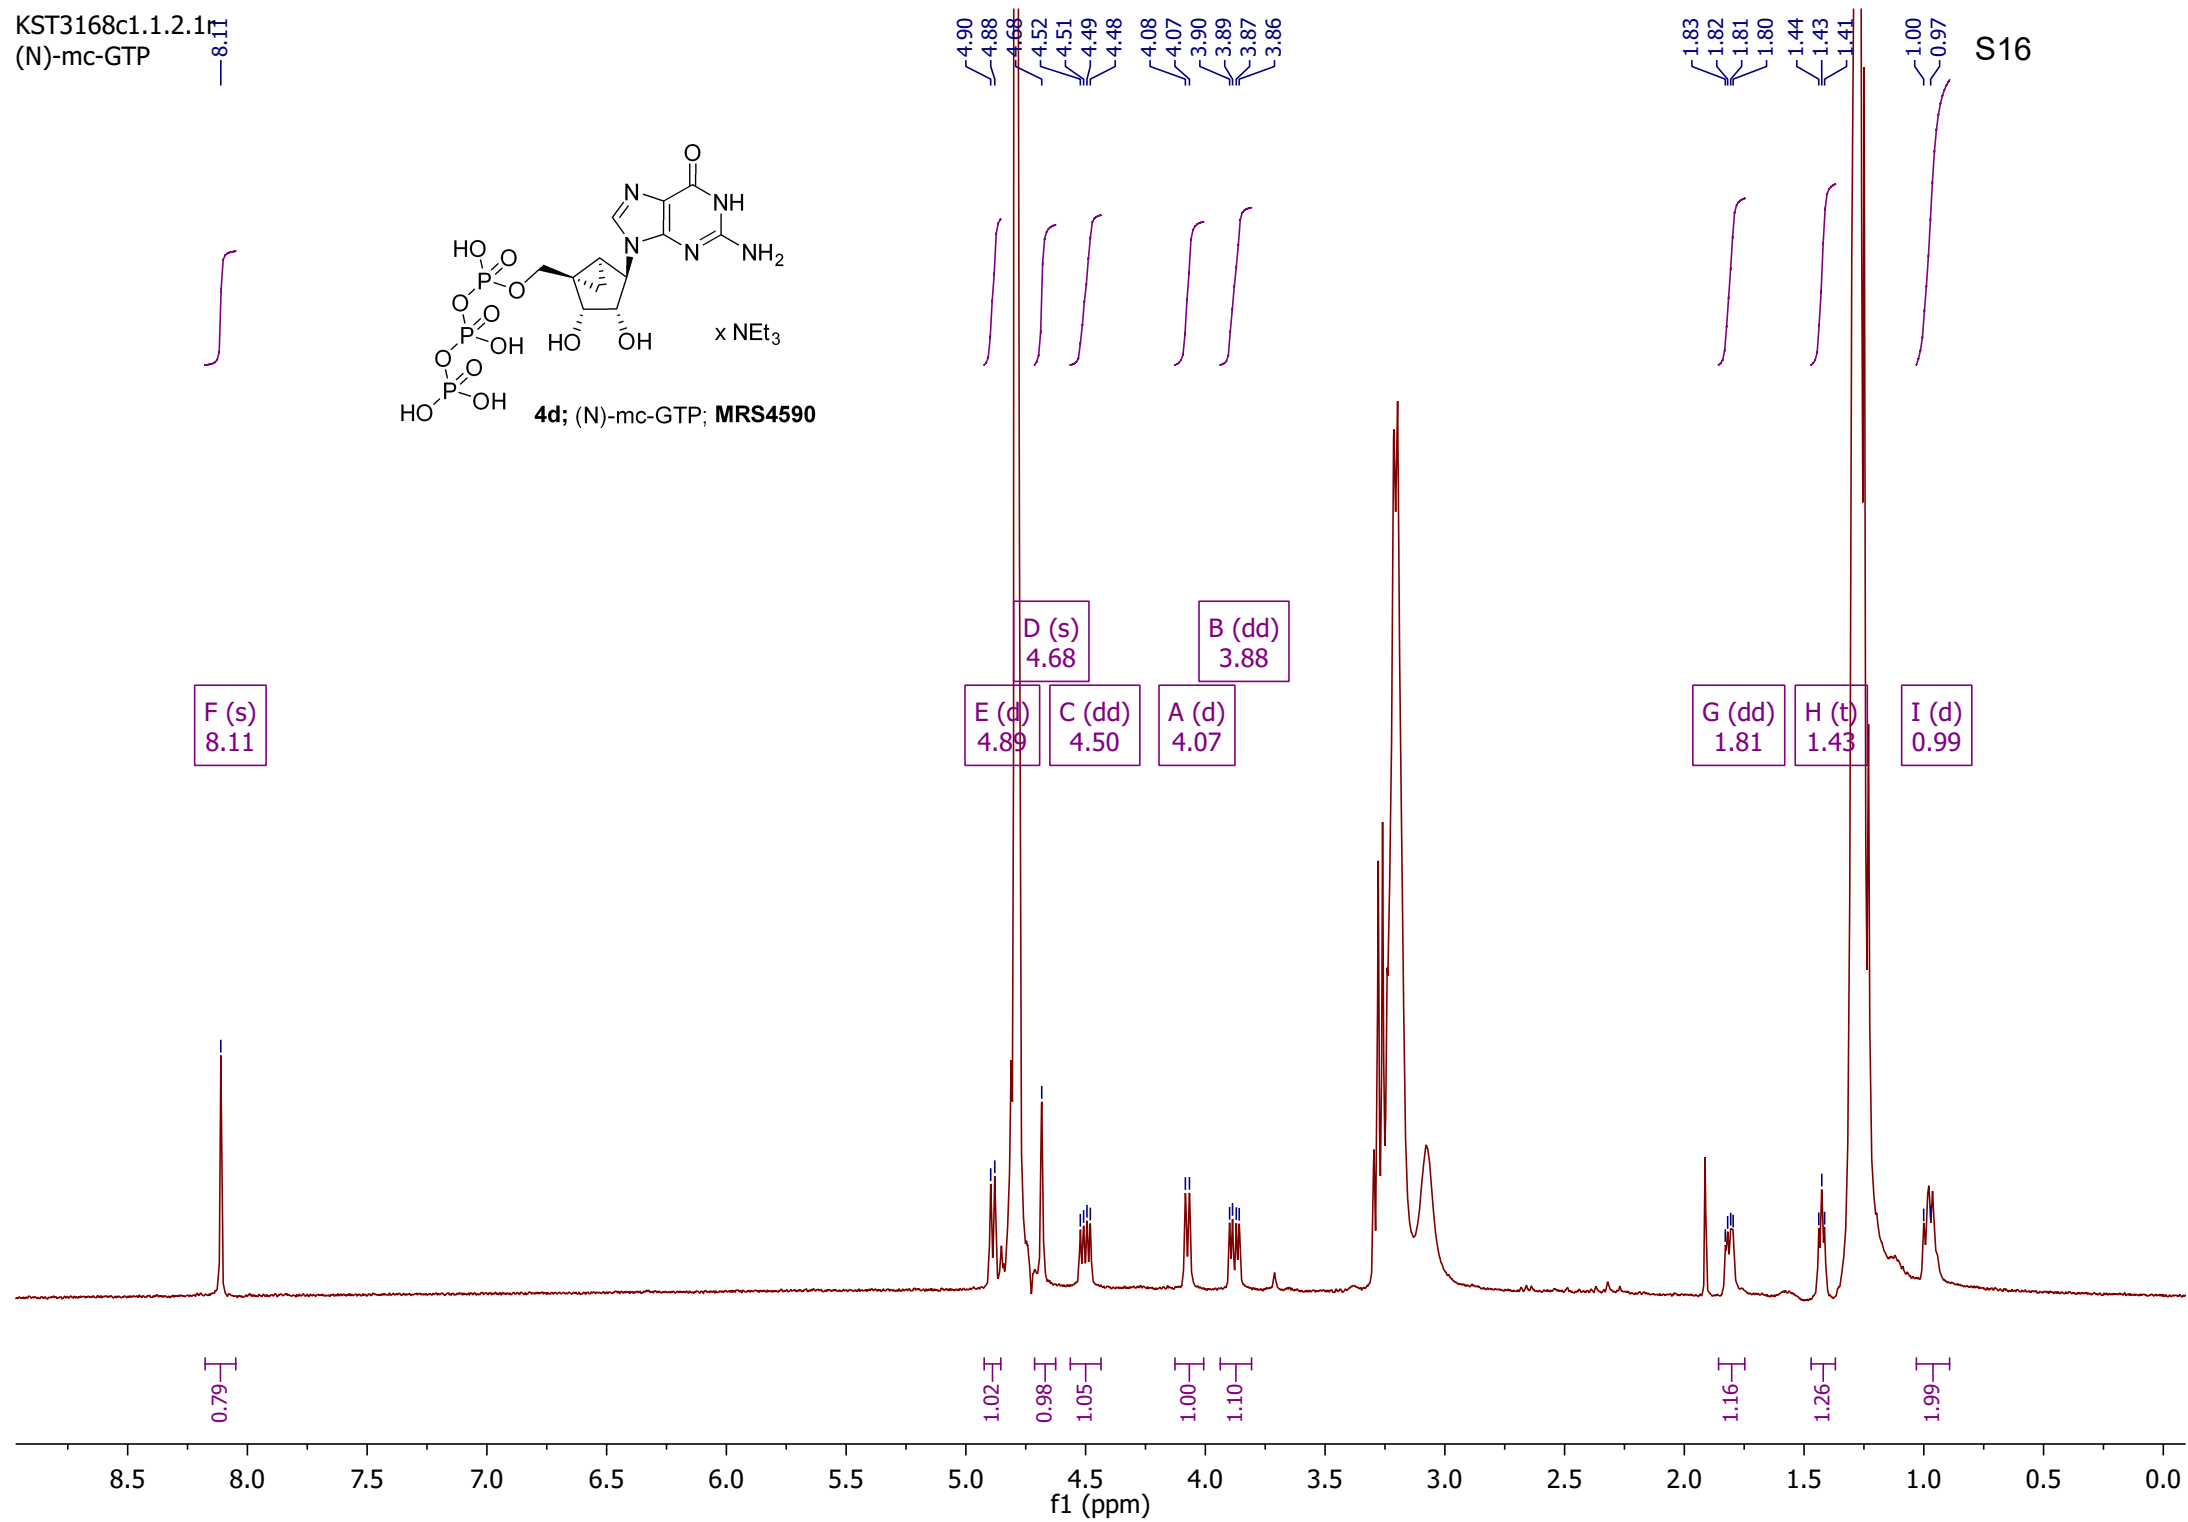



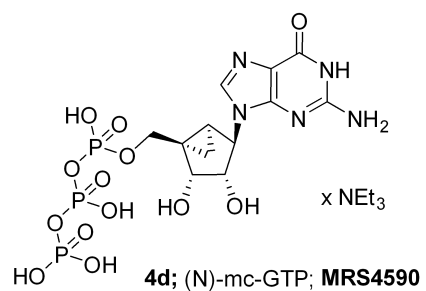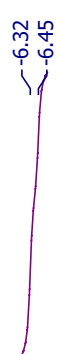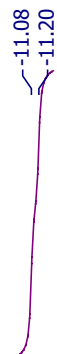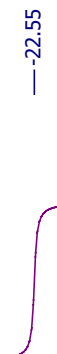

A (d)  
-6.39

B (d)  
-11.14

C (s)  
-22.55

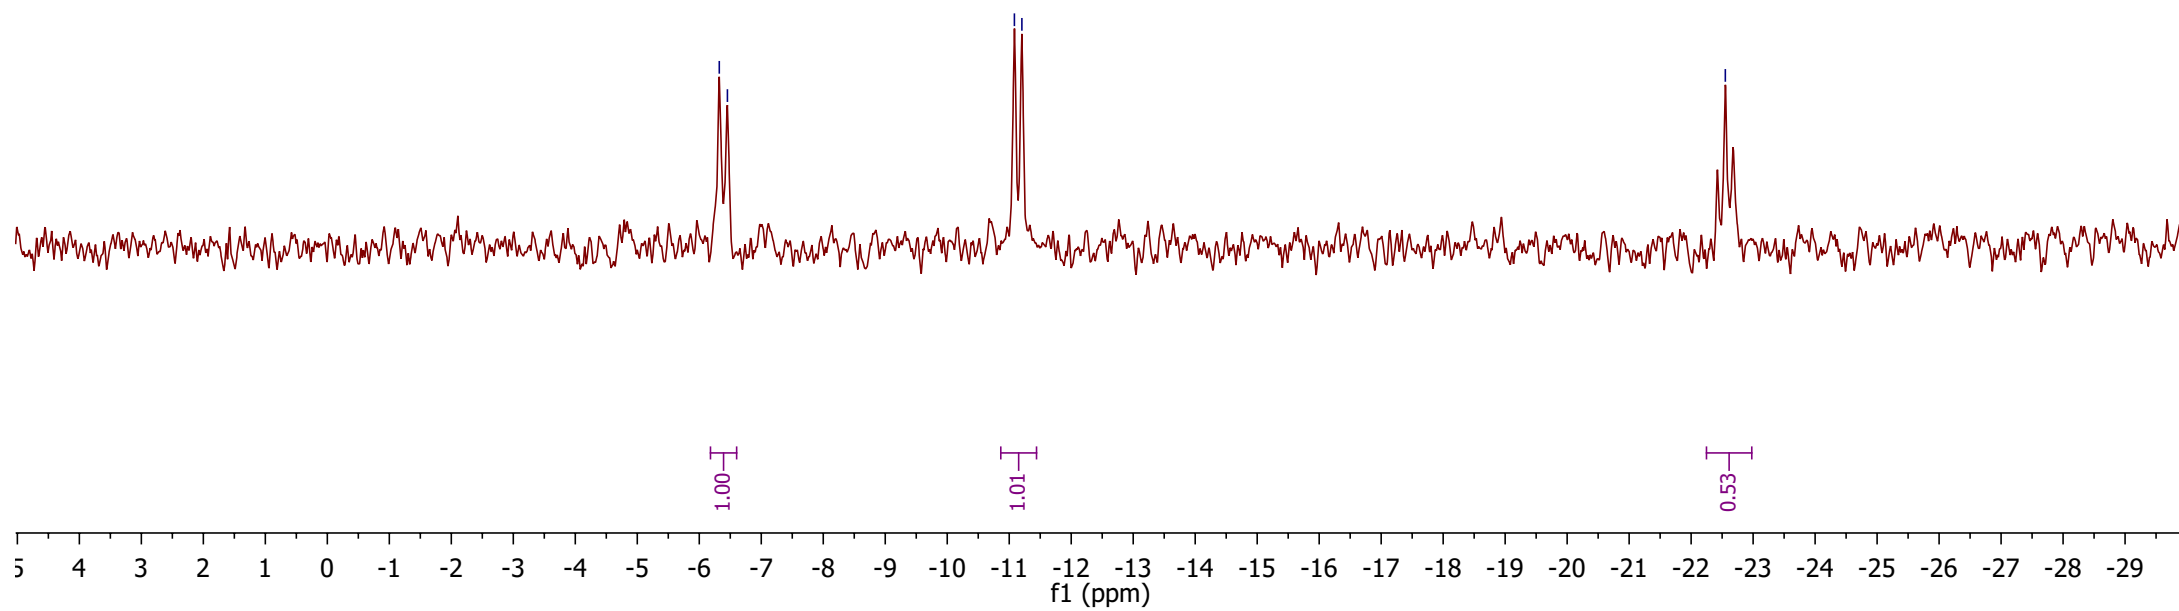

Single Mass Analysis

Tolerance = 10.0 mDa / DBE: min = -1.5, max = 100.0  
Element prediction: Off  
Number of isotope peaks used for i-FIT = 3

Monoisotopic Mass, Even Electron Ions  
89 formula(e) evaluated with 5 results within limits (up to 50 closest results for each mass)  
Elements Used:  
C: 0-150 H: 0-200 N: 5-5 O: 0-60 P: 3-3  
KST-24OCT18-3-168 199 (3.383) AM2 (Ar,22000.0,0.00,0.00); ABS; Cm (199-204x3.000)  
TOF MS ES-

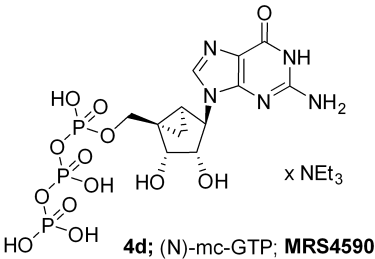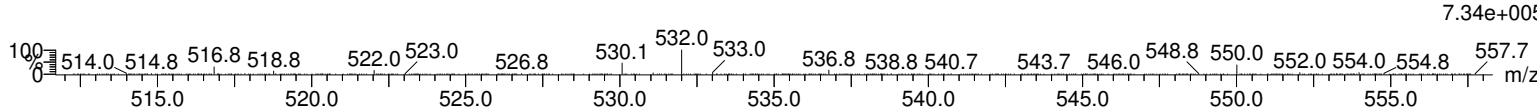

Minimum: -1.5  
Maximum: 10.0 5.0 100.0

| Mass     | Calc. Mass | mDa  | PPM   | DBE  | i-FIT | Norm  | Conf (%) | Formula           |
|----------|------------|------|-------|------|-------|-------|----------|-------------------|
| 532.0034 | 532.0036   | -0.2 | -0.4  | 8.5  | 280.7 | 1.296 | 27.36    | C12 H17 N5 O13 P3 |
|          | 532.0071   | -3.7 | -7.0  | 30.5 | 285.0 | 5.524 | 0.40     | C30 H9 N5 P3      |
|          | 531.9977   | 5.7  | 10.7  | 17.5 | 282.9 | 3.496 | 3.03     | C19 H13 N5 O8 P3  |
|          | 532.0094   | -6.0 | -11.3 | -0.5 | 279.8 | 0.376 | 68.64    | C5 H21 N5 O18 P3  |
|          | 532.0130   | -9.6 | -18.0 | 21.5 | 284.6 | 5.168 | 0.57     | C23 H13 N5 O5 P3  |

Injection Date : 10/29/2018 2:03:02 PM Seq. Line : 1  
Sample Name : KST3168C1 Location : Vial 1  
Acq. Operator : KIRAN Inj : 1  
Acq. Instrument : Instrument 1 Inj Volume : 100 µl  
Different Inj Volume from Sequence ! Actual Inj Volume : 10 µl  
Sequence File : C:\HPCHEM\1\SEQUENCE\DEF LC.S  
Method : C:\HPCHEM\1\METHODS\AN0010.M  
Last changed : 10/29/2018 1:58:46 PM by KIRAN

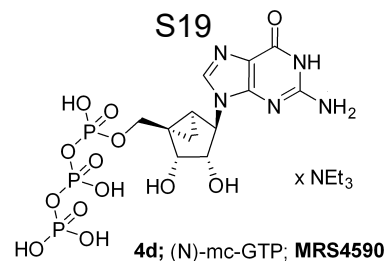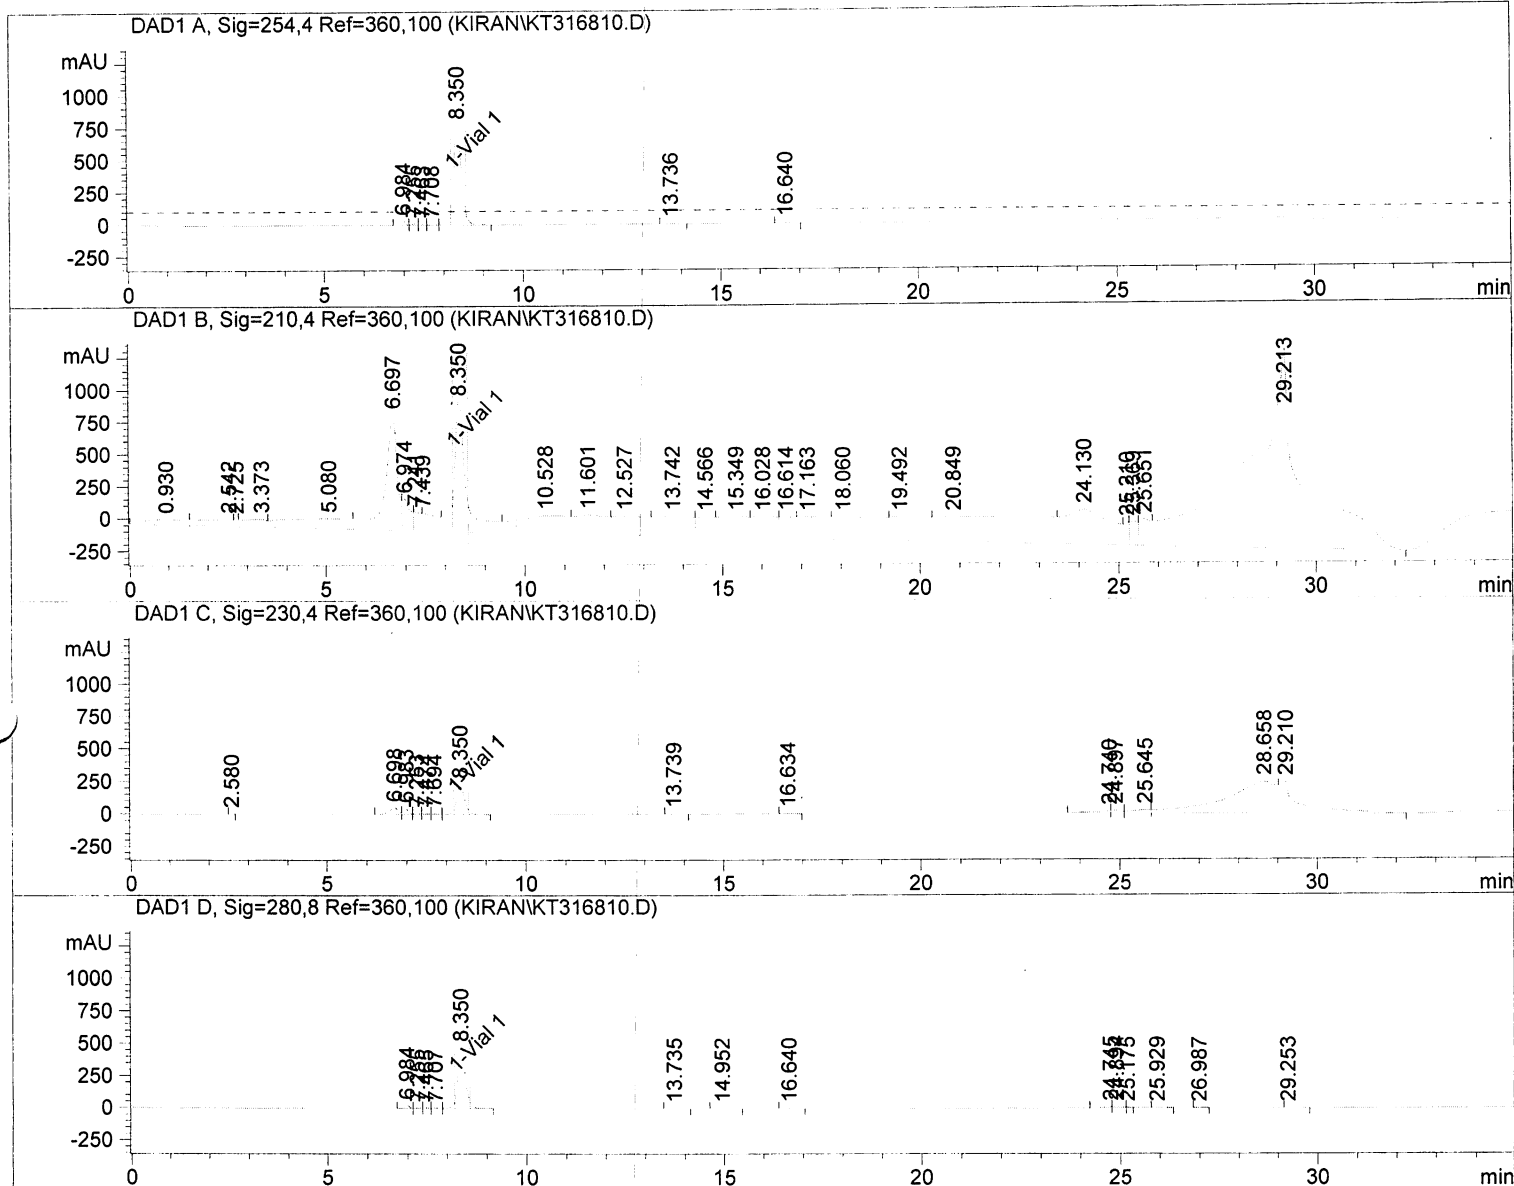

## Fraction Information

Fraction collection peak controlled

Maximum peak duration 4 min.

Fractions are collected, when at least one peak detector detects a peak

| Frac # | Well # | Location | Volume [µl] | BeginTime [min] | EndTime [min] | Reason | Mass |
|--------|--------|----------|-------------|-----------------|---------------|--------|------|
| 1      | 1      | 1-Vial 1 | 388.54      | 8.1935          | 8.5671        | DAD1   |      |

```

=====
Injection Date   : 10/29/2018 2:03:02 PM      Seq. Line :    1
Sample Name     : KST3168C1                  Location  : Vial 1
Acq. Operator   : KIRAN                      Inj       :    1
Acq. Instrument : Instrument 1                Inj Volume: 100 µl
Different Inj Volume from Sequence !        Actual Inj Volume : 10 µl
Sequence File   : C:\HPCHEM\1\SEQUENCE\DEF_LC.S
Method          : C:\HPCHEM\1\METHODS\AN0010.M
Last changed    : 10/29/2018 1:58:46 PM by KIRAN
=====

```

S20

```

=====
                          Area Percent Report
=====

```

```

Sorted By           :      Signal
Multiplier          :      1.0000
Dilution            :      1.0000
Use Multiplier & Dilution Factor with ISTDs

```

Signal 1: DAD1 A, Sig=254,4 Ref=360,100

| Peak # | RetTime [min] | Type | Width [min] | Area [mAU*s] | Height [mAU] | Area %  |
|--------|---------------|------|-------------|--------------|--------------|---------|
| 1      | 6.984         | BV   | 0.0990      | 225.05707    | 32.41987     | 2.0082  |
| 2      | 7.255         | VV   | 0.1245      | 93.36584     | 10.84363     | 0.8331  |
| 3      | 7.463         | VV   | 0.1357      | 64.37907     | 6.60344      | 0.5745  |
| 4      | 7.708         | VV   | 0.1748      | 83.75539     | 6.74958      | 0.7474  |
| 5      | 8.350         | VB   | 0.2049      | 1.06213e4    | 770.09058    | 94.7748 |
| 6      | 13.736        | PB   | 0.2371      | 58.96265     | 3.79847      | 0.5261  |
| 7      | 16.640        | PB   | 0.2193      | 60.06382     | 4.29052      | 0.5360  |

Totals : 1.12069e4 834.79609

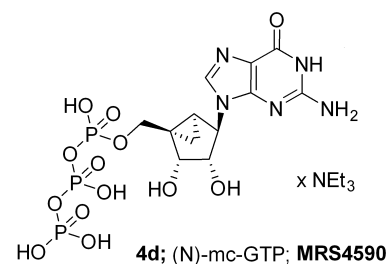

Results obtained with enhanced integrator!

Signal 2: DAD1 B, Sig=210,4 Ref=360,100

| Peak # | RetTime [min] | Type | Width [min] | Area [mAU*s] | Height [mAU] | Area %  |
|--------|---------------|------|-------------|--------------|--------------|---------|
| 1      | 0.930         | BV   | 0.8822      | 3061.28247   | 42.10805     | 0.7814  |
| 2      | 2.542         | VV   | 0.7255      | 3275.00928   | 54.46832     | 0.8360  |
| 3      | 2.725         | VV   | 0.1065      | 381.19550    | 51.38649     | 0.0973  |
| 4      | 3.373         | VV   | 0.5029      | 2517.98315   | 62.11631     | 0.6427  |
| 5      | 5.080         | VV   | 1.3873      | 9218.00684   | 78.30944     | 2.3530  |
| 6      | 6.697         | VV   | 0.3107      | 1.95432e4    | 902.40100    | 4.9886  |
| 7      | 6.974         | VV   | 0.1769      | 3331.91064   | 244.66580    | 0.8505  |
| 8      | 7.241         | VV   | 0.1637      | 1821.59058   | 147.87582    | 0.4650  |
| 9      | 7.439         | VV   | 0.3341      | 3580.31958   | 135.56551    | 0.9139  |
| 10     | 8.350         | VB   | 0.2960      | 2.22037e4    | 1044.37256   | 5.6678  |
| 11     | 10.528        | BV   | 1.1833      | 1.26388e4    | 137.64383    | 3.2262  |
| 12     | 11.601        | VV   | 0.8090      | 8797.97461   | 151.17723    | 2.2458  |
| 13     | 12.527        | VV   | 0.7942      | 8812.46387   | 148.09711    | 2.2495  |
| 14     | 13.742        | VV   | 0.8146      | 1.00259e4    | 155.00137    | 2.5592  |
| 15     | 14.566        | VV   | 0.4055      | 4754.67822   | 154.31708    | 1.2137  |
| 16     | 15.349        | VV   | 0.6718      | 8336.83203   | 161.07726    | 2.1281  |
| 17     | 16.028        | VV   | 0.5963      | 7266.52441   | 164.83006    | 1.8549  |
| 18     | 16.614        | VV   | 0.3543      | 4373.76709   | 168.80350    | 1.1165  |
| 19     | 17.163        | VV   | 0.6815      | 8822.52246   | 168.87540    | 2.2521  |
| 20     | 18.060        | VV   | 1.0834      | 1.54463e4    | 173.71725    | 3.9428  |
| 21     | 19.492        | VV   | 0.8060      | 1.18171e4    | 182.35114    | 3.0165  |
| 22     | 20.849        | VV   | 2.3115      | 3.71373e4    | 192.43486    | 9.4797  |
| 23     | 24.130        | VV   | 1.0699      | 2.14320e4    | 268.88361    | 5.4708  |
| 24     | 25.210        | VV   | 0.1255      | 1564.47534   | 176.34169    | 0.3994  |
| 25     | 25.369        | VV   | 0.1905      | 2596.48975   | 184.18478    | 0.6628  |
| 26     | 25.651        | VV   | 0.2571      | 4016.47827   | 204.51772    | 1.0253  |
| 27     | 29.213        | VP   | 1.1856      | 1.54980e5    | 1548.50171   | 39.5606 |

S21

```
=====
Injection Date   : 10/29/2018 2:03:02 PM      Seq. Line :    1
Sample Name     : KST3168C1                  Location  : Vial 1
Acq. Operator   : KIRAN                      Inj       :    1
Acq. Instrument : Instrument 1                Inj Volume: 100 µl
Different Inj Volume from Sequence !      Actual Inj Volume: 10 µl
Sequence File   : C:\HPCHEM\1\SEQUENCE\DEF LC.S
Method          : C:\HPCHEM\1\METHODS\AN0010.M
Last changed    : 10/29/2018 1:58:46 PM by KIRAN
=====
```

| Peak #                                    | RetTime [min] | Type | Width [min] | Area [mAU*s] | Height [mAU] | Area % |
|-------------------------------------------|---------------|------|-------------|--------------|--------------|--------|
| ----- ----- ----- ----- ----- ----- ----- |               |      |             |              |              |        |
| Totals :                                  |               |      |             | 3.91754e5    | 7104.02488   |        |

Results obtained with enhanced integrator!

Signal 3: DAD1 C, Sig=230,4 Ref=360,100

| Peak #                                    | RetTime [min] | Type | Width [min] | Area [mAU*s] | Height [mAU] | Area %  |
|-------------------------------------------|---------------|------|-------------|--------------|--------------|---------|
| ----- ----- ----- ----- ----- ----- ----- |               |      |             |              |              |         |
| 1                                         | 2.580         | BP   | 0.0835      | 11.37449     | 2.15732      | 0.0315  |
| 2                                         | 6.698         | BV   | 0.2350      | 795.41589    | 51.26986     | 2.2015  |
| 3                                         | 6.983         | VV   | 0.1135      | 351.72830    | 42.96552     | 0.9735  |
| 4                                         | 7.253         | VV   | 0.1499      | 73.25932     | 6.58177      | 0.2028  |
| 5                                         | 7.474         | VV   | 0.1716      | 74.30257     | 5.79390      | 0.2056  |
| 6                                         | 7.694         | VV   | 0.1886      | 72.17373     | 5.17864      | 0.1998  |
| 7                                         | 8.350         | VB   | 0.2082      | 3208.79492   | 227.95531    | 8.8809  |
| 8                                         | 13.739        | BB   | 0.2541      | 17.96131     | 1.04726      | 0.0497  |
| 9                                         | 16.634        | PP   | 0.1964      | 12.73746     | 1.02941      | 0.0353  |
| 10                                        | 24.740        | BV   | 0.3141      | 369.98257    | 14.48000     | 1.0240  |
| 11                                        | 24.897        | VV   | 0.1957      | 317.99911    | 22.12216     | 0.8801  |
| 12                                        | 25.645        | VV   | 0.4417      | 823.62286    | 23.80437     | 2.2795  |
| 13                                        | 28.658        | VV   | 1.1493      | 2.14270e4    | 242.86955    | 59.3033 |
| 14                                        | 29.210        | VP   | 0.4293      | 8574.88184   | 242.06310    | 23.7326 |

Totals : 3.61313e4 889.31816

Results obtained with enhanced integrator!

Signal 4: DAD1 D, Sig=280,8 Ref=360,100

| Peak #                                    | RetTime [min] | Type | Width [min] | Area [mAU*s] | Height [mAU] | Area %  |
|-------------------------------------------|---------------|------|-------------|--------------|--------------|---------|
| ----- ----- ----- ----- ----- ----- ----- |               |      |             |              |              |         |
| 1                                         | 6.984         | BV   | 0.0996      | 188.88846    | 27.00465     | 2.5807  |
| 2                                         | 7.255         | VV   | 0.1266      | 61.18793     | 6.96003      | 0.8360  |
| 3                                         | 7.465         | VV   | 0.1395      | 41.45719     | 4.11762      | 0.5664  |
| 4                                         | 7.707         | VV   | 0.1720      | 53.11303     | 4.30424      | 0.7256  |
| 5                                         | 8.350         | VB   | 0.2047      | 6514.38916   | 472.91422    | 89.0017 |
| 6                                         | 13.735        | PB   | 0.2318      | 36.13347     | 2.39781      | 0.4937  |
| 7                                         | 14.952        | BB   | 0.3620      | 41.28629     | 1.55376      | 0.5641  |
| 8                                         | 16.640        | PB   | 0.2229      | 38.21883     | 2.70478      | 0.5222  |
| 9                                         | 24.745        | PV   | 0.1716      | 117.36393    | 8.80149      | 1.6035  |
| 10                                        | 24.894        | VV   | 0.1789      | 151.24405    | 11.69575     | 2.0663  |
| 11                                        | 25.175        | VB   | 0.1093      | 15.69675     | 1.92091      | 0.2145  |
| 12                                        | 25.929        | PP   | 0.1561      | 13.72323     | 1.29062      | 0.1875  |
| 13                                        | 26.987        | PP   | 0.1280      | 10.04806     | 1.19666      | 0.1373  |
| 14                                        | 29.253        | PB   | 0.2193      | 36.64611     | 2.08257      | 0.5007  |

Totals : 7319.39648 548.94510

Results obtained with enhanced integrator!

## =====

## Summed Peaks Report

Signal 1: DAD1 A, Sig=254,4 Ref=360,100

```
=====
Injection Date   : 10/29/2018 2:03:02 PM      Seq. Line :    1
Sample Name      : KST3168C1                  Location  : Vial 1
Acq. Operator    : KIRAN                      Inj       :    1
Acq. Instrument  : Instrument 1                Inj Volume: 100 µl
Different Inj Volume from Sequence !          Actual Inj Volume: 10 µl
Sequence File    : C:\HPCHEM\1\SEQUENCE\DEF_LC.S
Method           : C:\HPCHEM\1\METHODS\AN0010.M
Last changed     : 10/29/2018 1:58:46 PM by KIRAN
=====
```

S22

```
Signal 2: DAD1 B, Sig=210,4 Ref=360,100
Signal 3: DAD1 C, Sig=230,4 Ref=360,100
Signal 4: DAD1 D, Sig=280,8 Ref=360,100
=====
```

```
=====
                          Final Summed Peaks Report
=====
```

```
Signal 1: DAD1 A, Sig=254,4 Ref=360,100
Signal 2: DAD1 B, Sig=210,4 Ref=360,100
Signal 3: DAD1 C, Sig=230,4 Ref=360,100
Signal 4: DAD1 D, Sig=280,8 Ref=360,100
```

```
*** End of Report ***
```



Single Mass Analysis

Tolerance = 5.0 PPM / DBE: min = -1.5, max = 100.0  
Element prediction: Off  
Number of isotope peaks used for i-FIT = 3

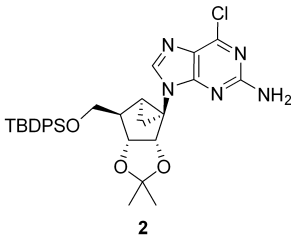

Monoisotopic Mass, Even Electron Ions  
120 formula(e) evaluated with 1 results within limits (up to 50 closest results for each mass)  
Elements Used:  
C: 0-100 H: 0-200 N: 5-5 O: 0-40 28Si: 1-1 35Cl: 1-1  
KST-16AUG18-5-152-A 224 (3.806) AM2 (Ar,42000.0,0.00,0.00); ABS  
TOF MS ES+

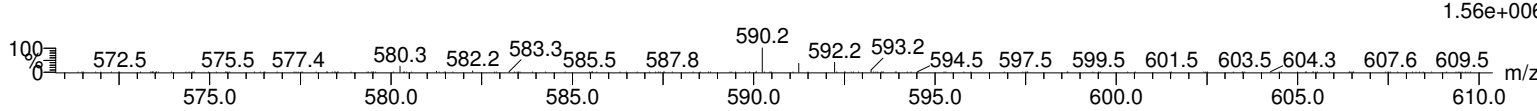

|          |            |      |      |       |       |      |          |                         |  |
|----------|------------|------|------|-------|-------|------|----------|-------------------------|--|
| Minimum: |            |      |      | -1.5  |       |      |          |                         |  |
| Maximum: |            | 5.0  | 5.0  | 100.0 |       |      |          |                         |  |
| Mass     | Calc. Mass | mDa  | PPM  | DBE   | i-FIT | Norm | Conf (%) | Formula                 |  |
| 590.2353 | 590.2354   | -0.1 | -0.2 | 16.5  | 106.9 | n/a  | n/a      | C31 H37 N5 O3 28Si 35Cl |  |



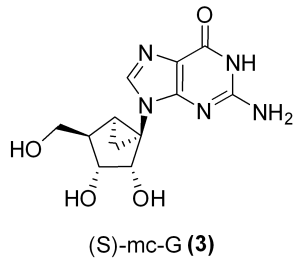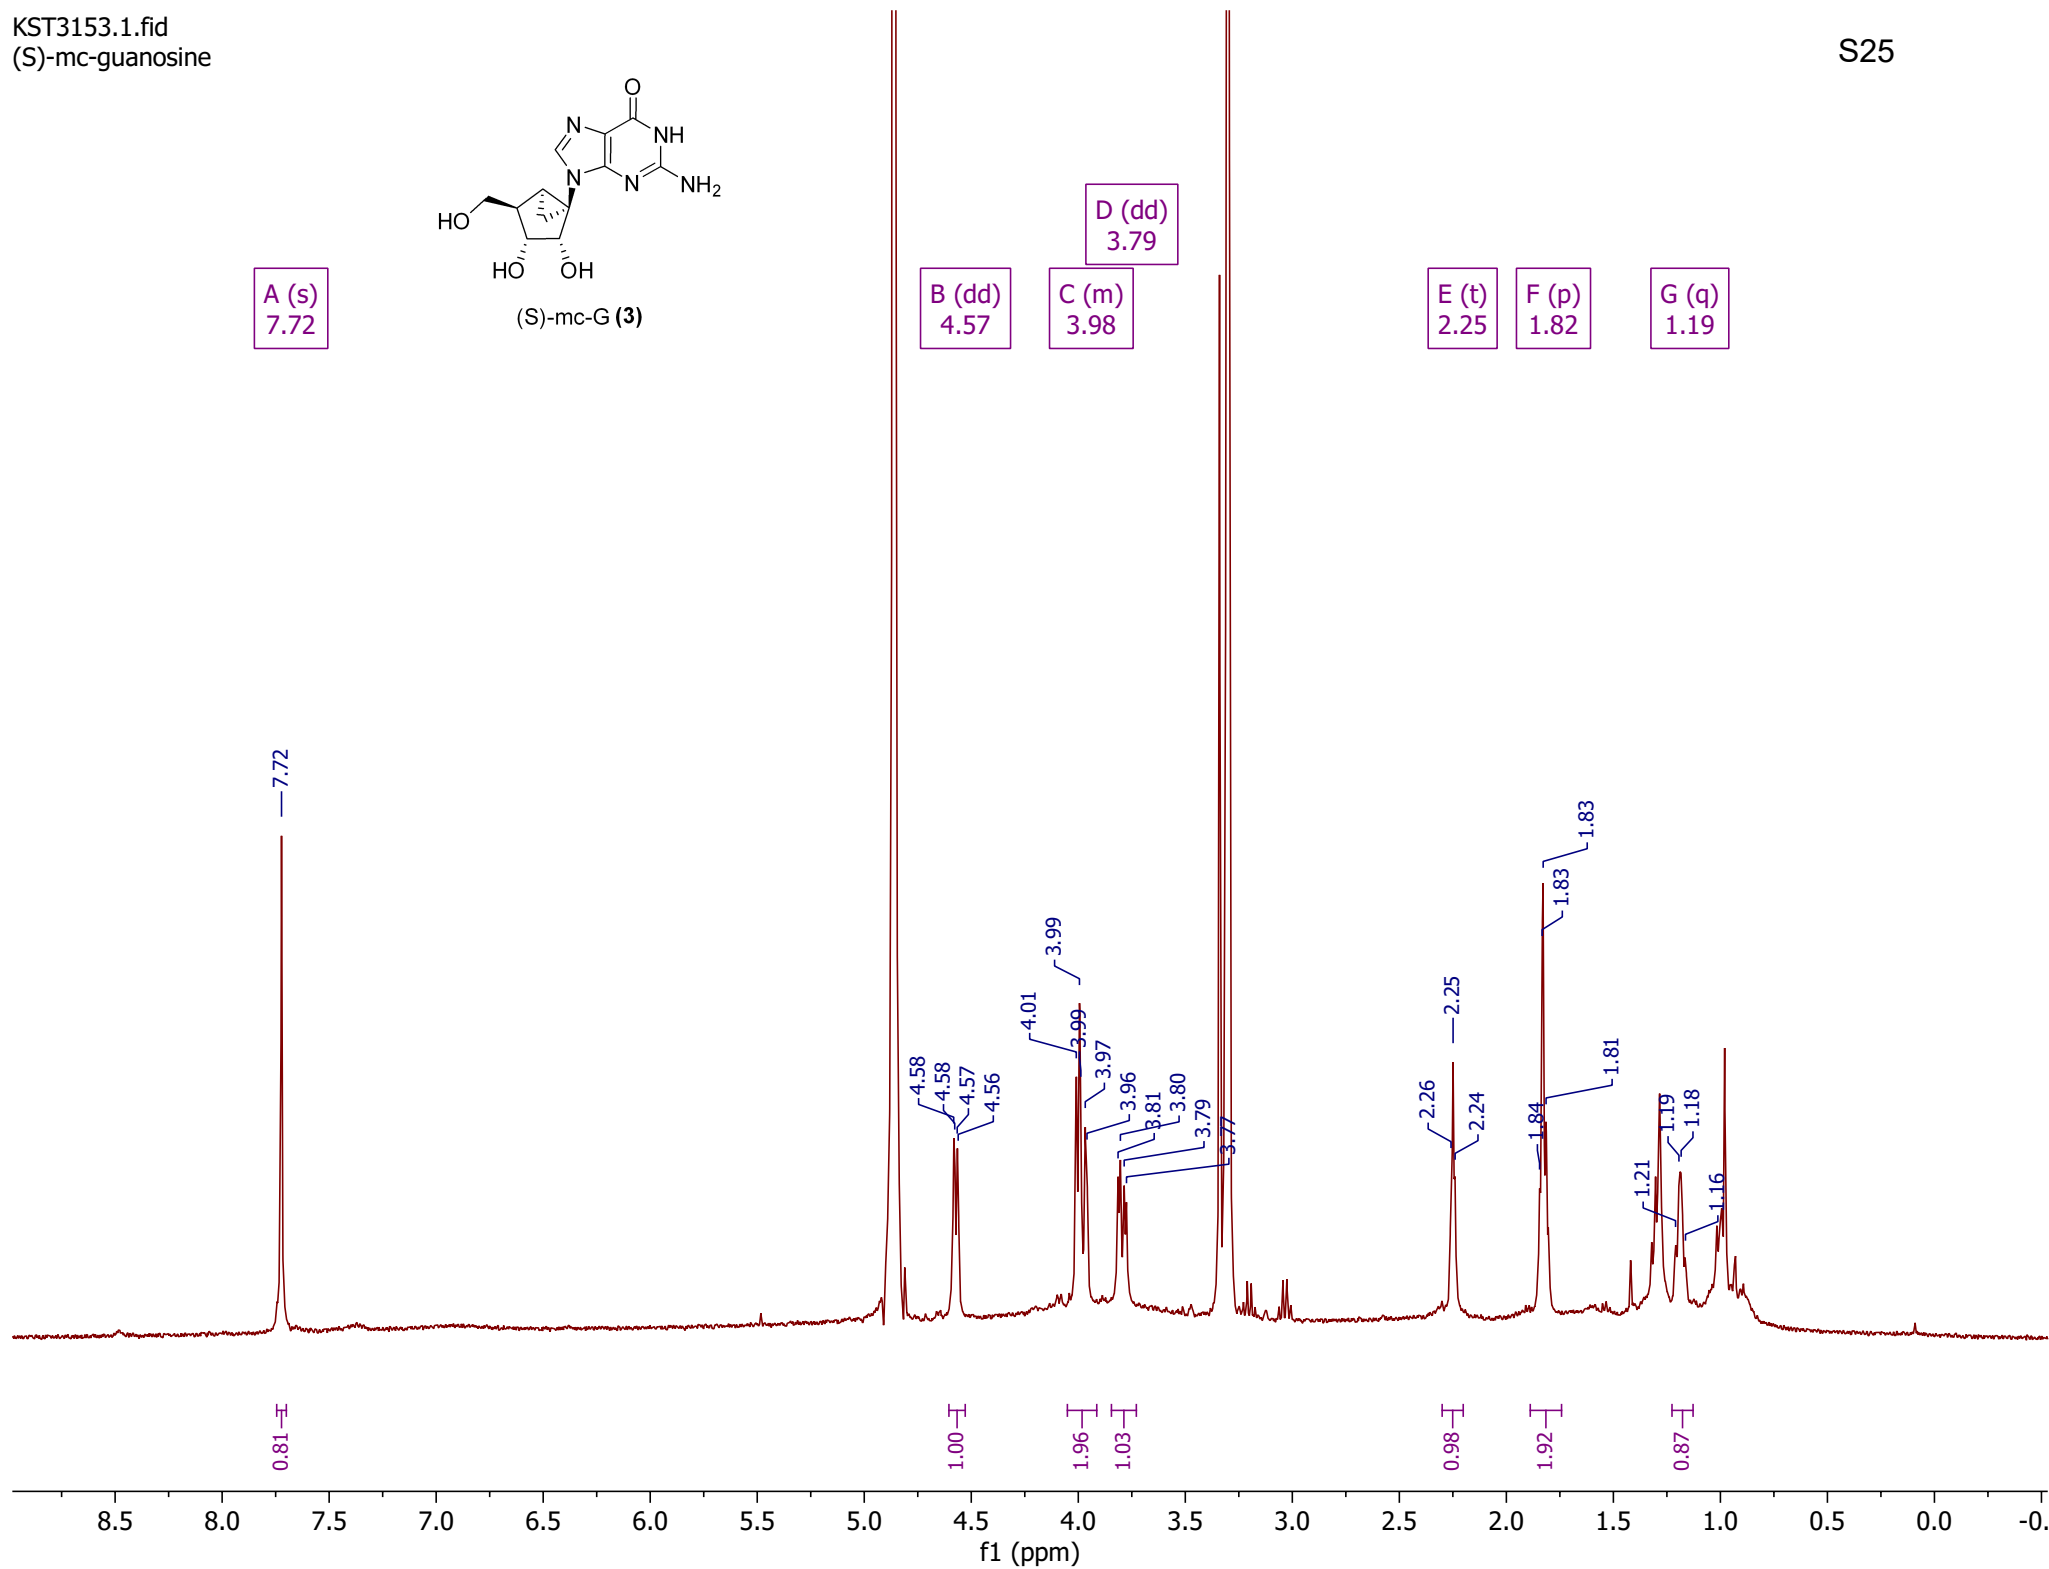

Single Mass Analysis

Tolerance = 5.0 PPM / DBE: min = -1.5, max = 100.0  
Element prediction: Off  
Number of isotope peaks used for i-FIT = 3

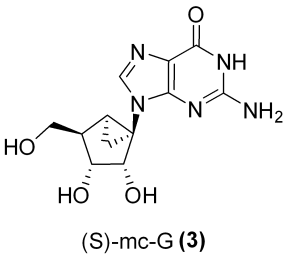

Monoisotopic Mass, Even Electron Ions  
40 formula(e) evaluated with 1 results within limits (up to 50 closest results for each mass)  
Elements Used:  
C: 0-100 H: 0-200 N: 5-5 O: 0-40  
KST-28AUG18-3-153 136 (2.317) AM2 (Ar,42000.0,0.00,0.00); ABS  
TOF MS ES+

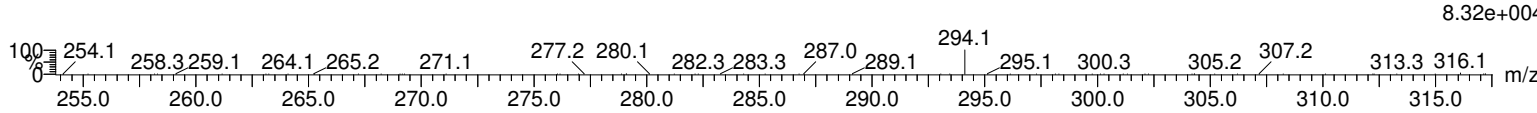

Minimum: -1.5  
Maximum: 5.0 5.0 100.0

| Mass     | Calc. Mass | mDa  | PPM  | DBE | i-FIT | Norm | Conf (%) | Formula       |
|----------|------------|------|------|-----|-------|------|----------|---------------|
| 294.1201 | 294.1202   | -0.1 | -0.3 | 7.5 | 31.3  | n/a  | n/a      | C12 H16 N5 O4 |

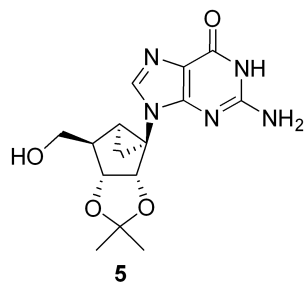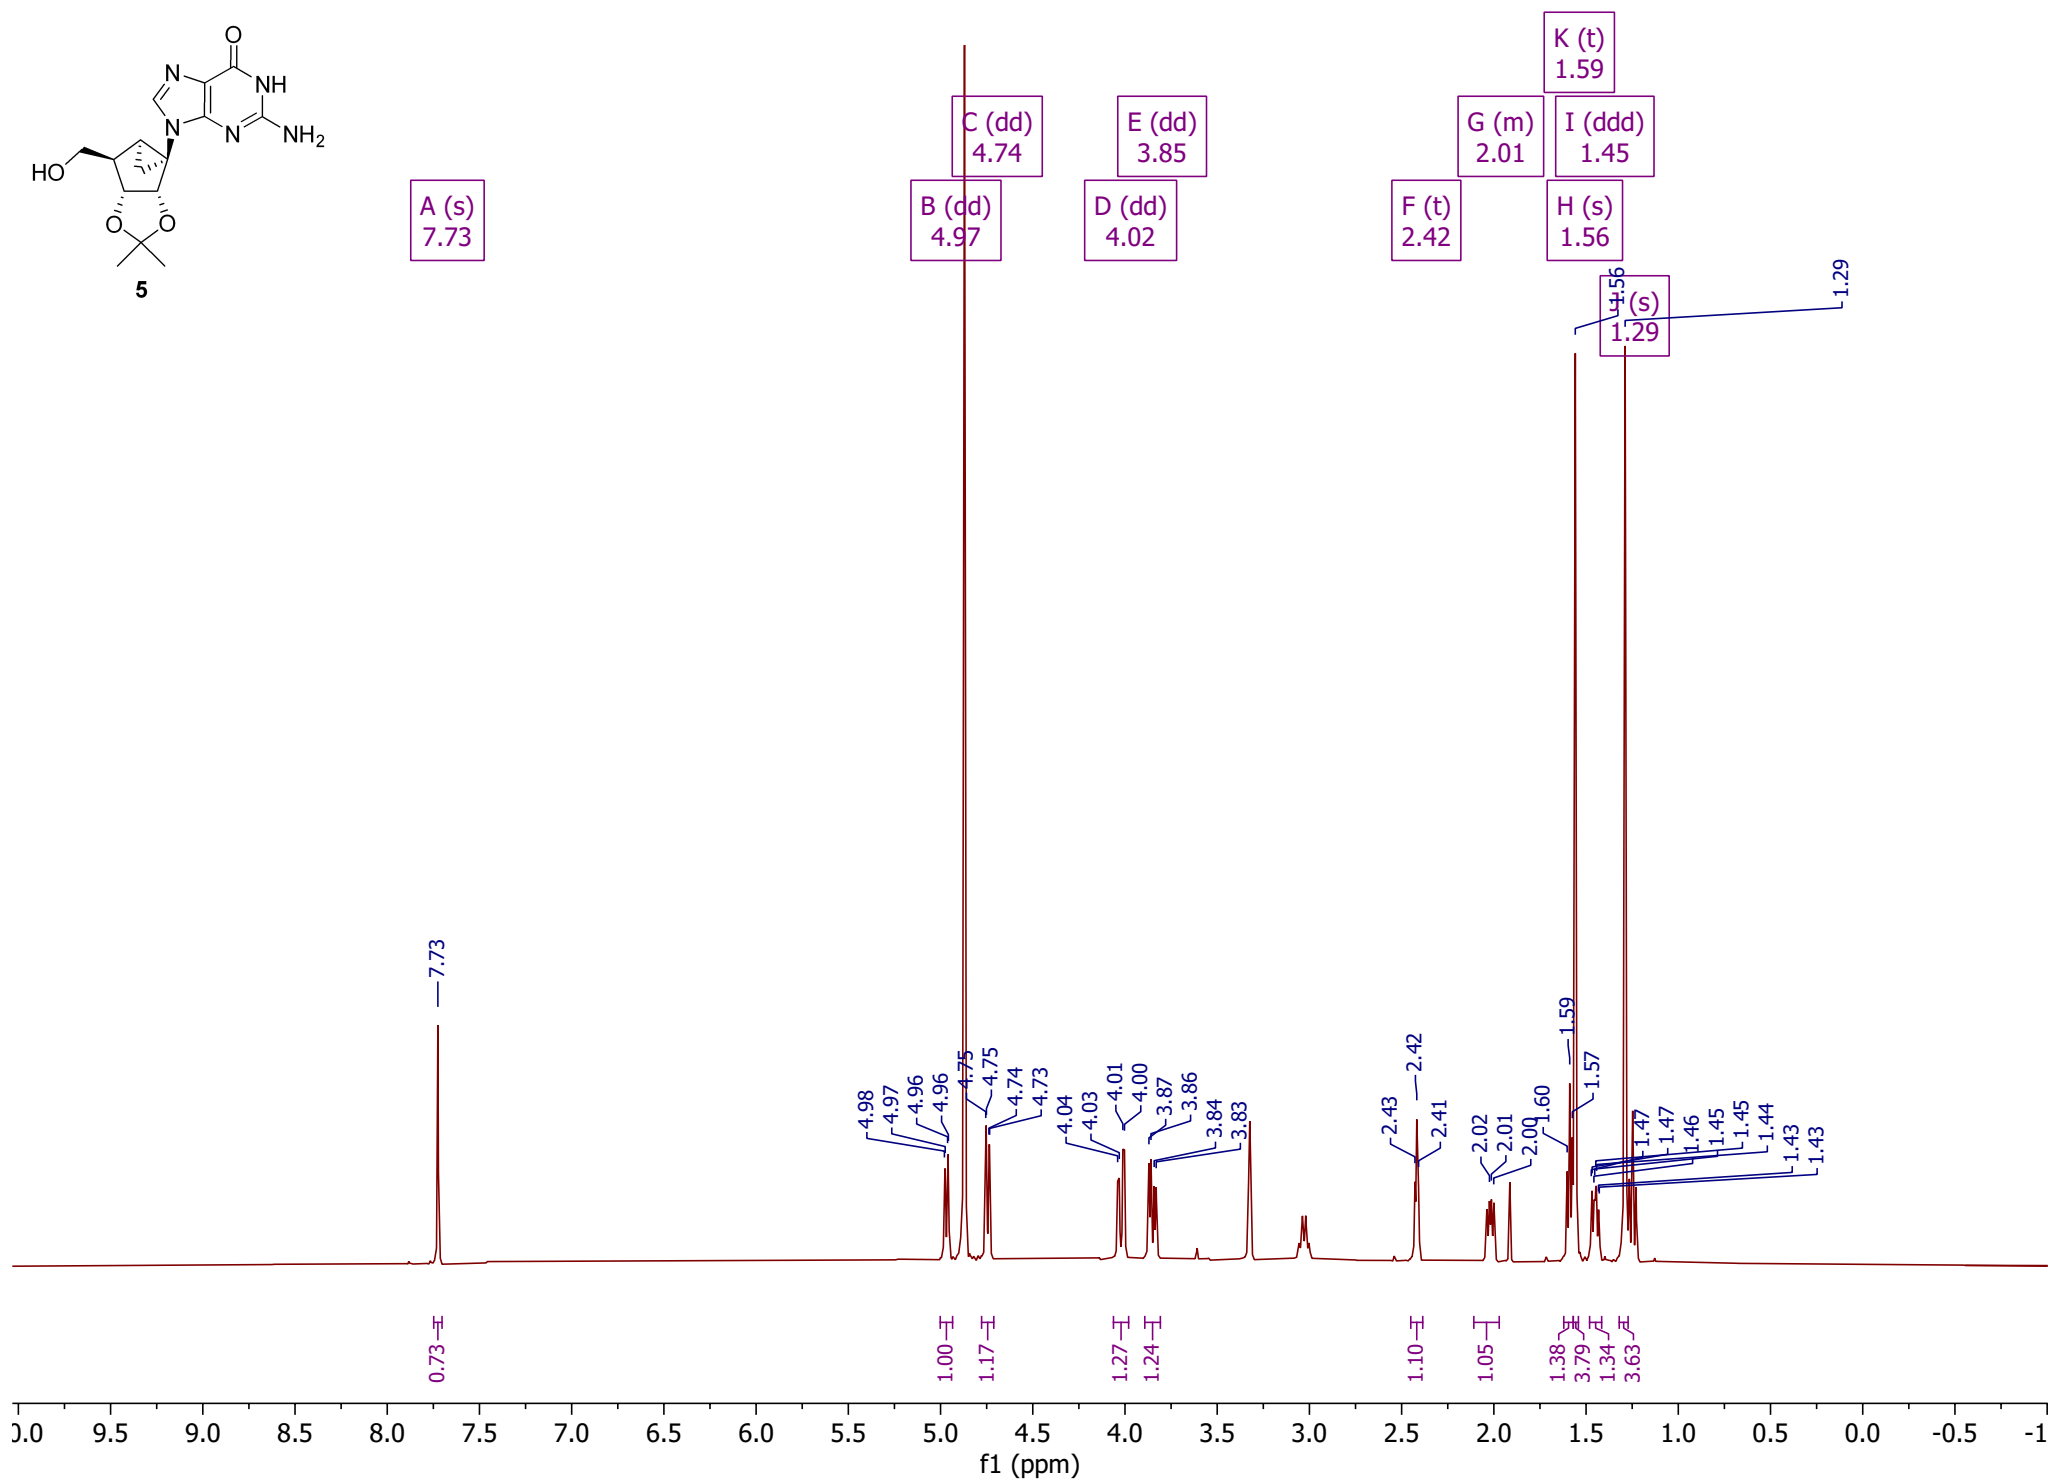

Single Mass Analysis

Tolerance = 5.0 mDa / DBE: min = -1.5, max = 100.0  
Element prediction: Off  
Number of isotope peaks used for i-FIT = 3

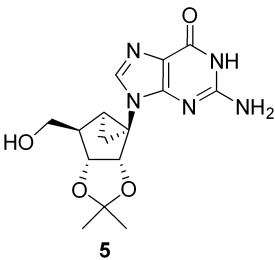

Monoisotopic Mass, Even Electron Ions  
51 formula(e) evaluated with 1 results within limits (up to 50 closest results for each mass)  
Elements Used:  
C: 0-100 H: 0-250 N: 5-5 O: 0-60  
KST-08JAN20-3-170 252 (4.280) AM2 (Ar,25000.0,0.00,0.00); ABS  
TOF MS ES+

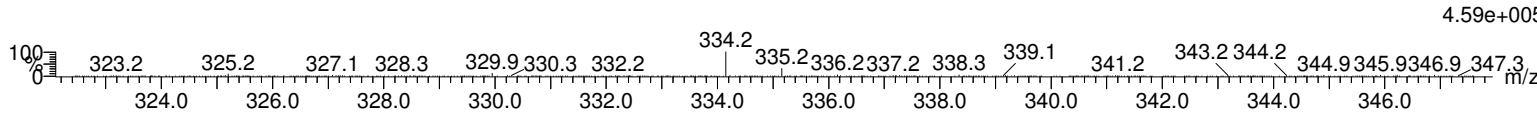

Minimum: -1.5  
Maximum: 5.0 5.0 100.0

| Mass     | Calc. Mass | mDa | PPM | DBE | i-FIT | Norm | Conf (%) | Formula       |
|----------|------------|-----|-----|-----|-------|------|----------|---------------|
| 334.1519 | 334.1515   | 0.4 | 1.2 | 8.5 | 522.7 | n/a  | n/a      | C15 H20 N5 O4 |

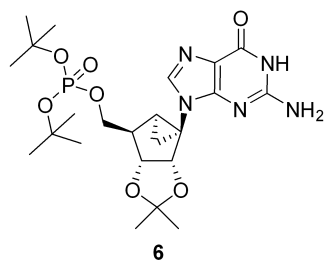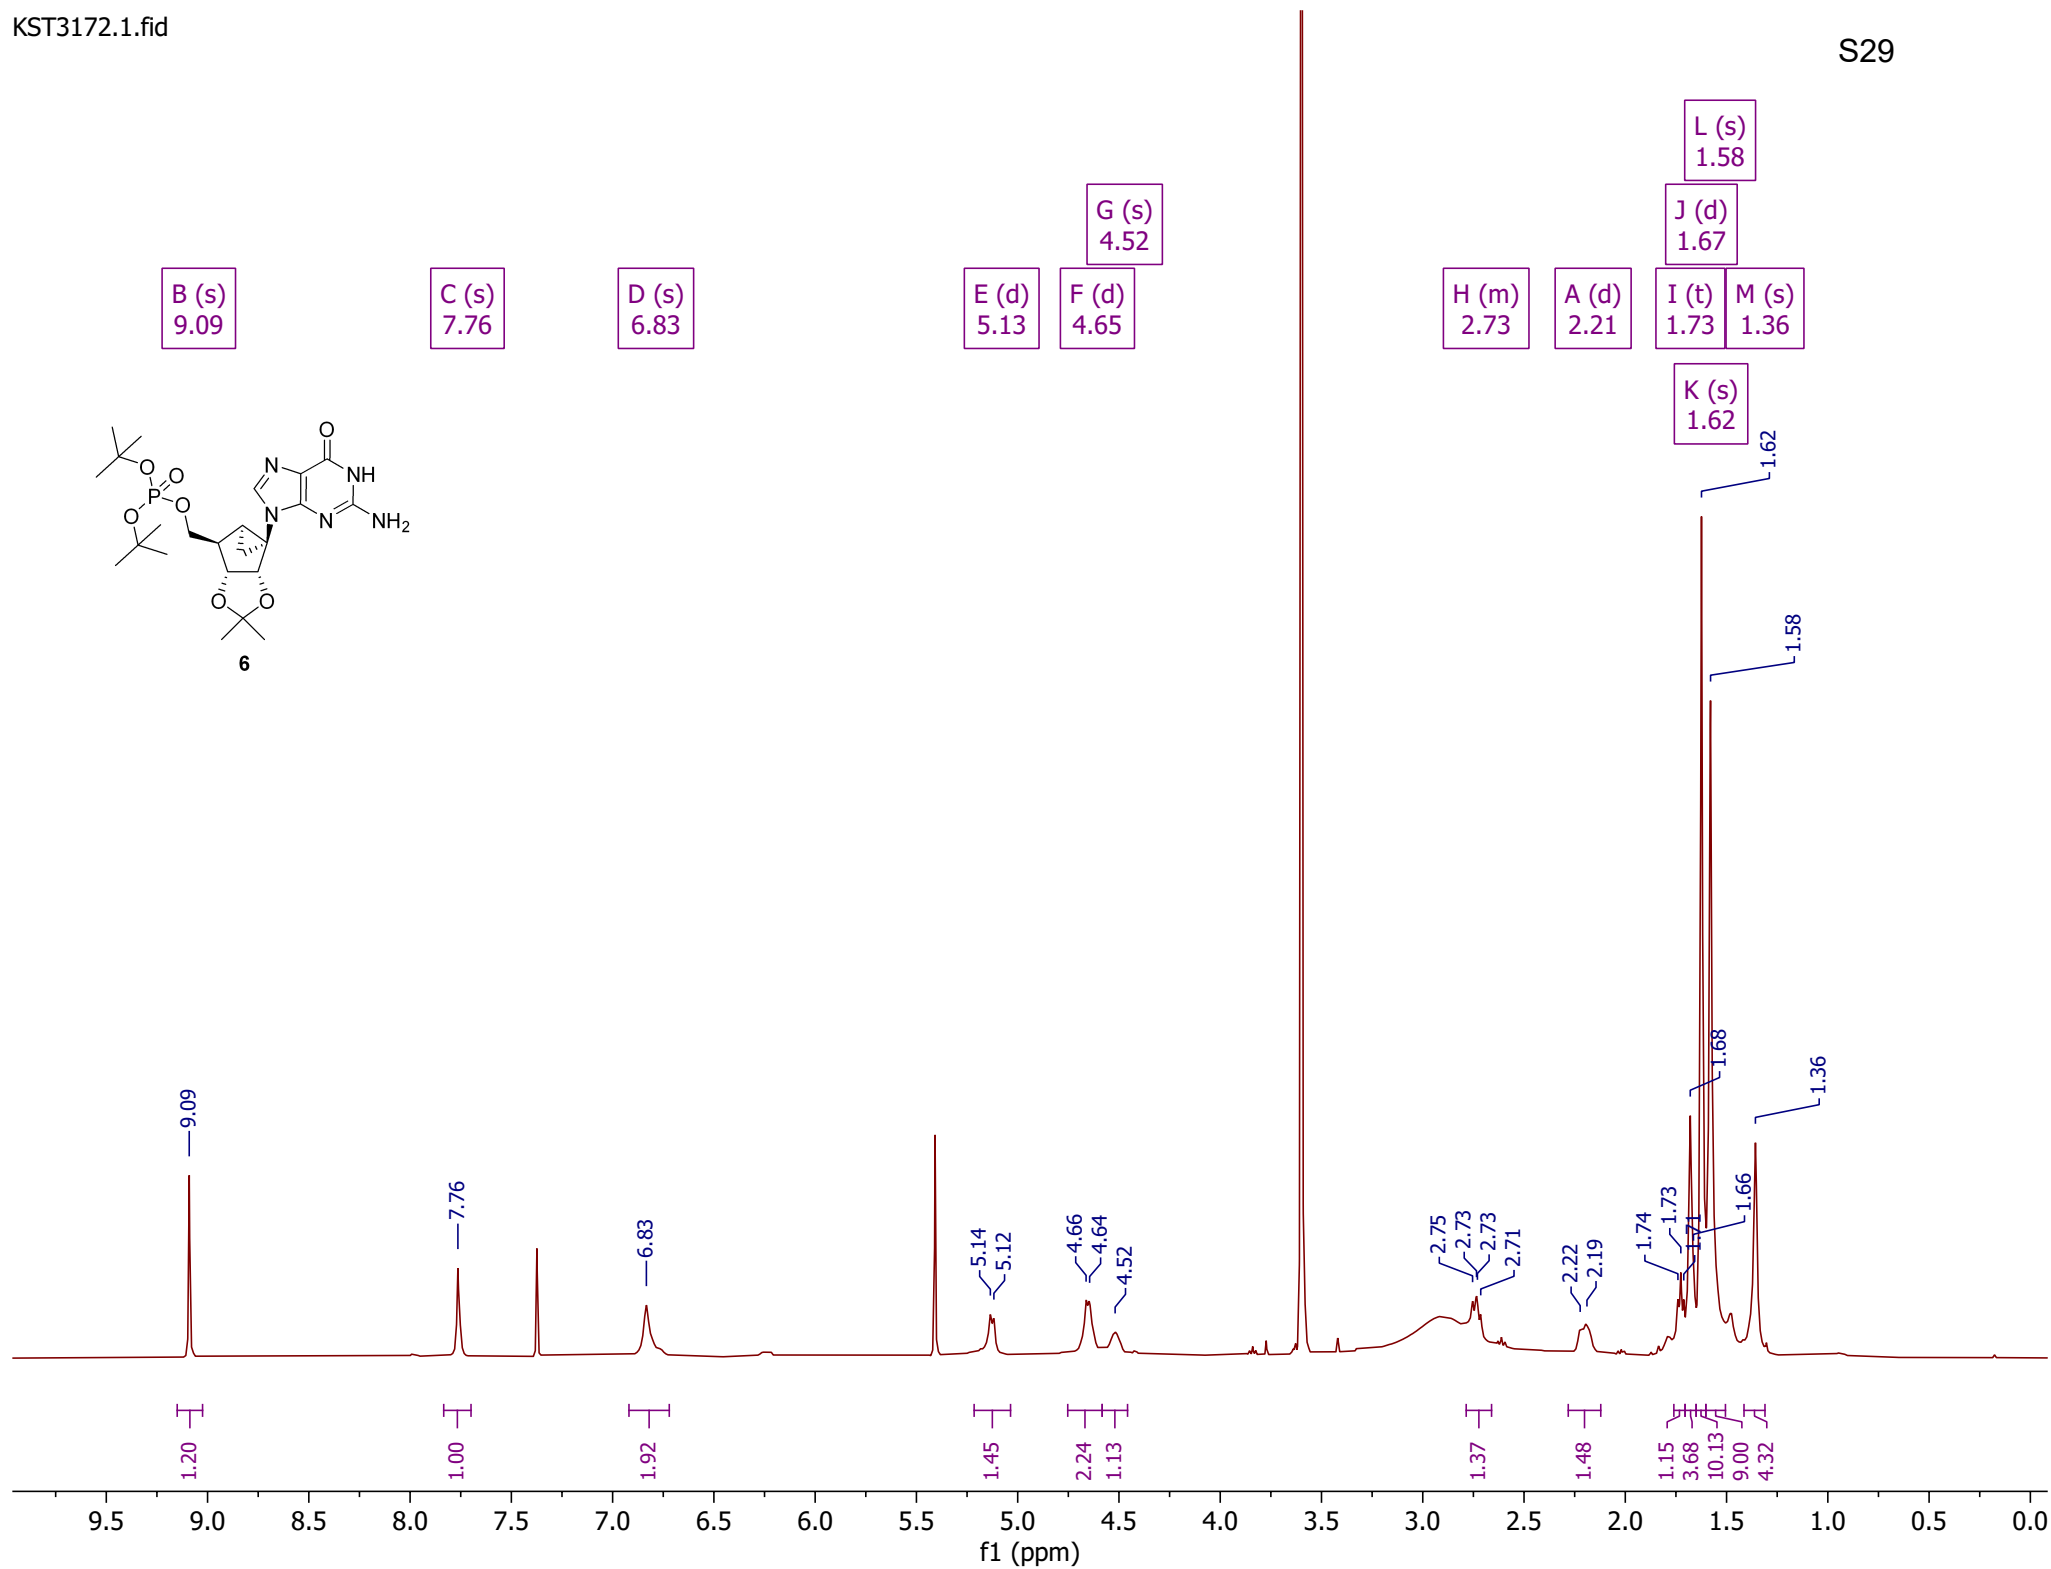

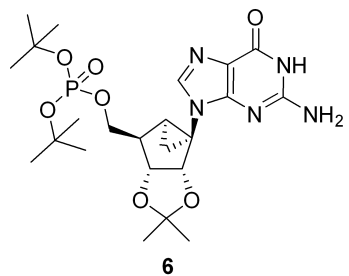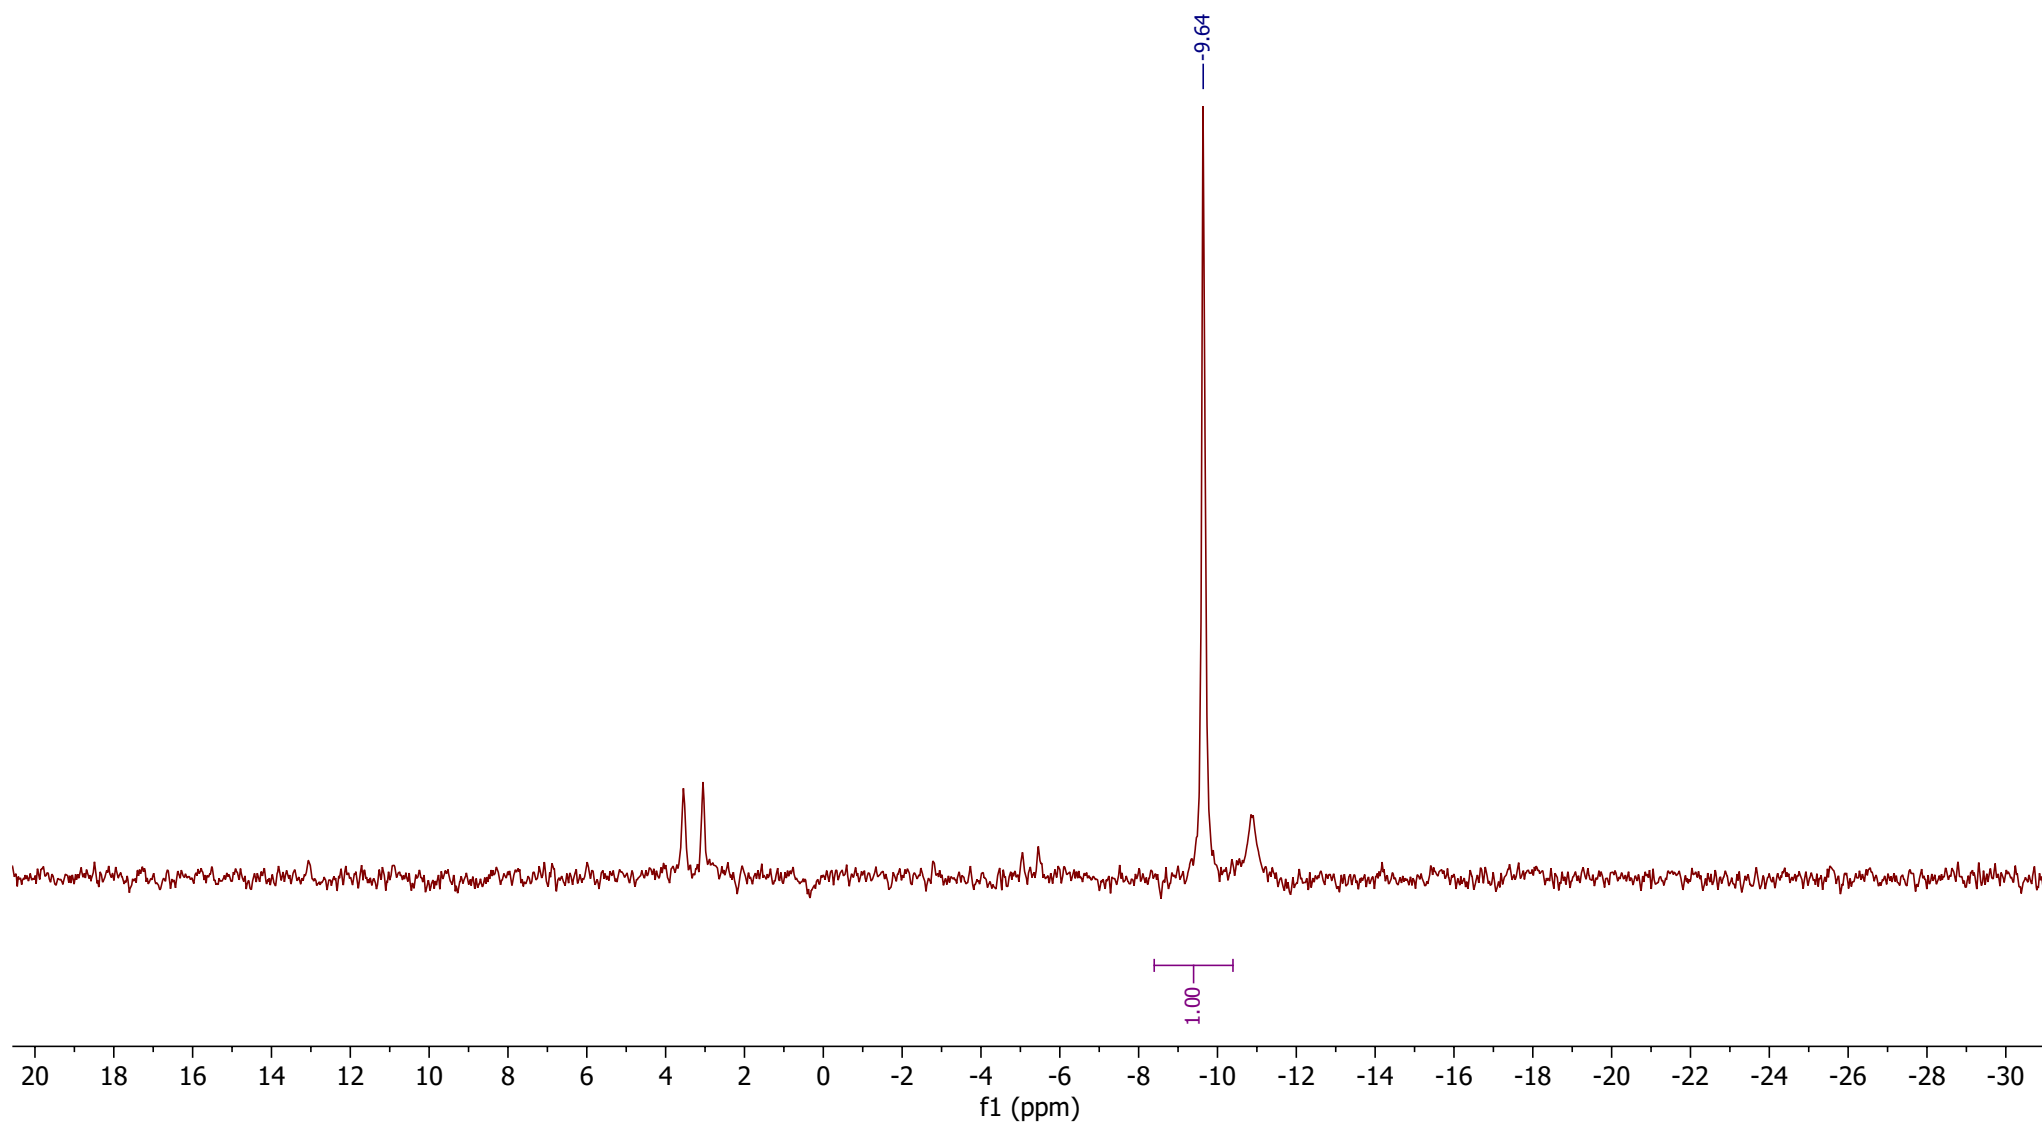

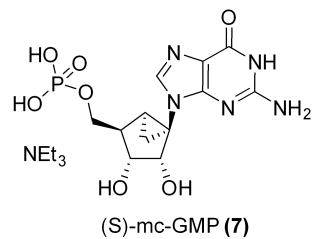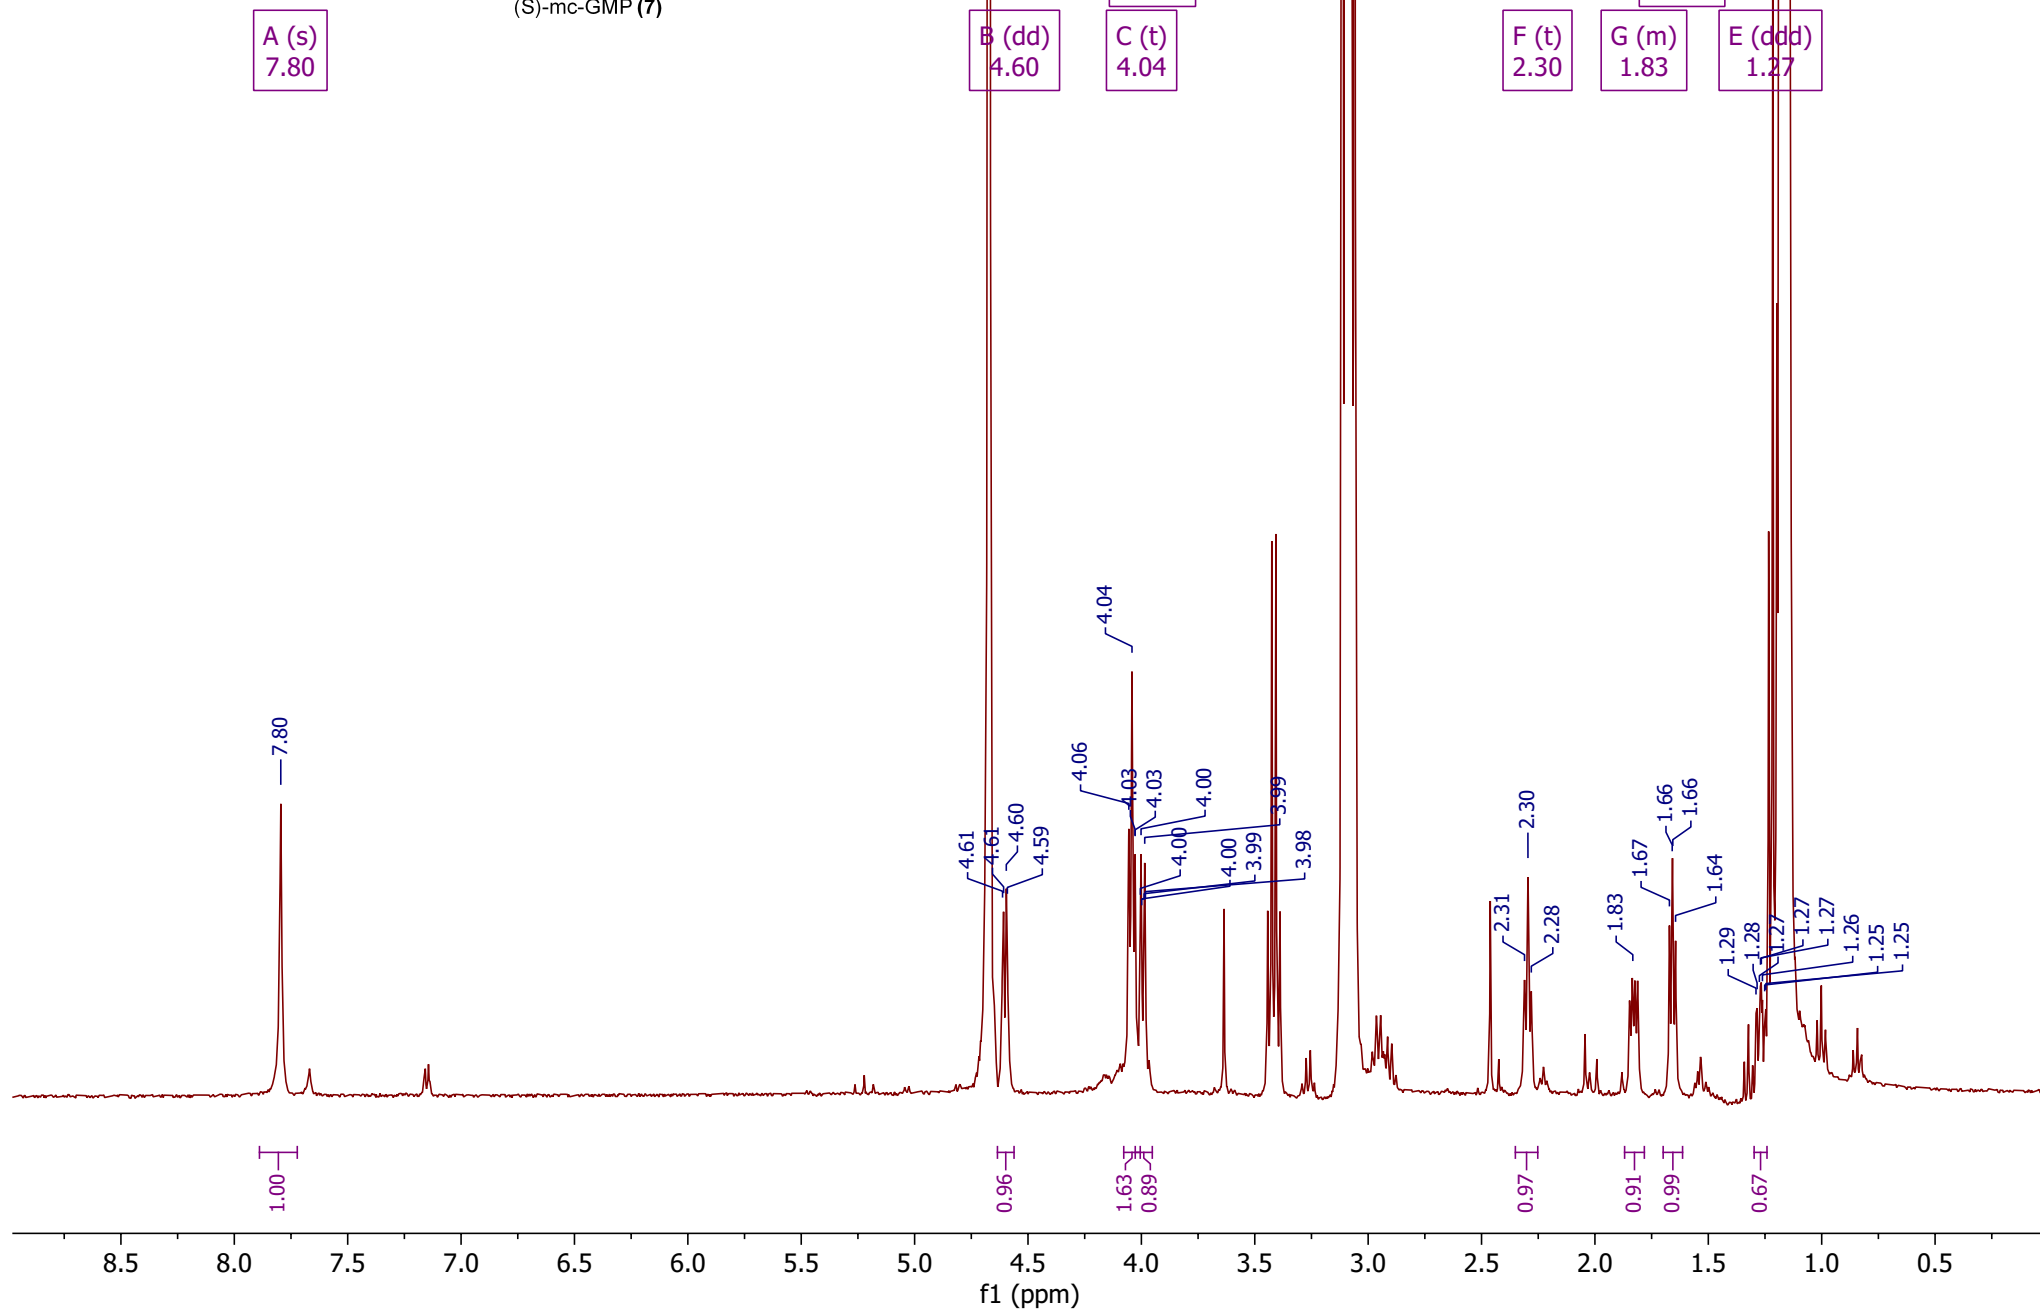

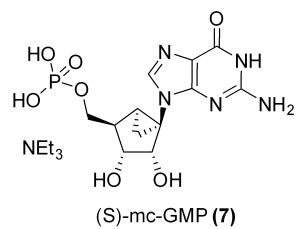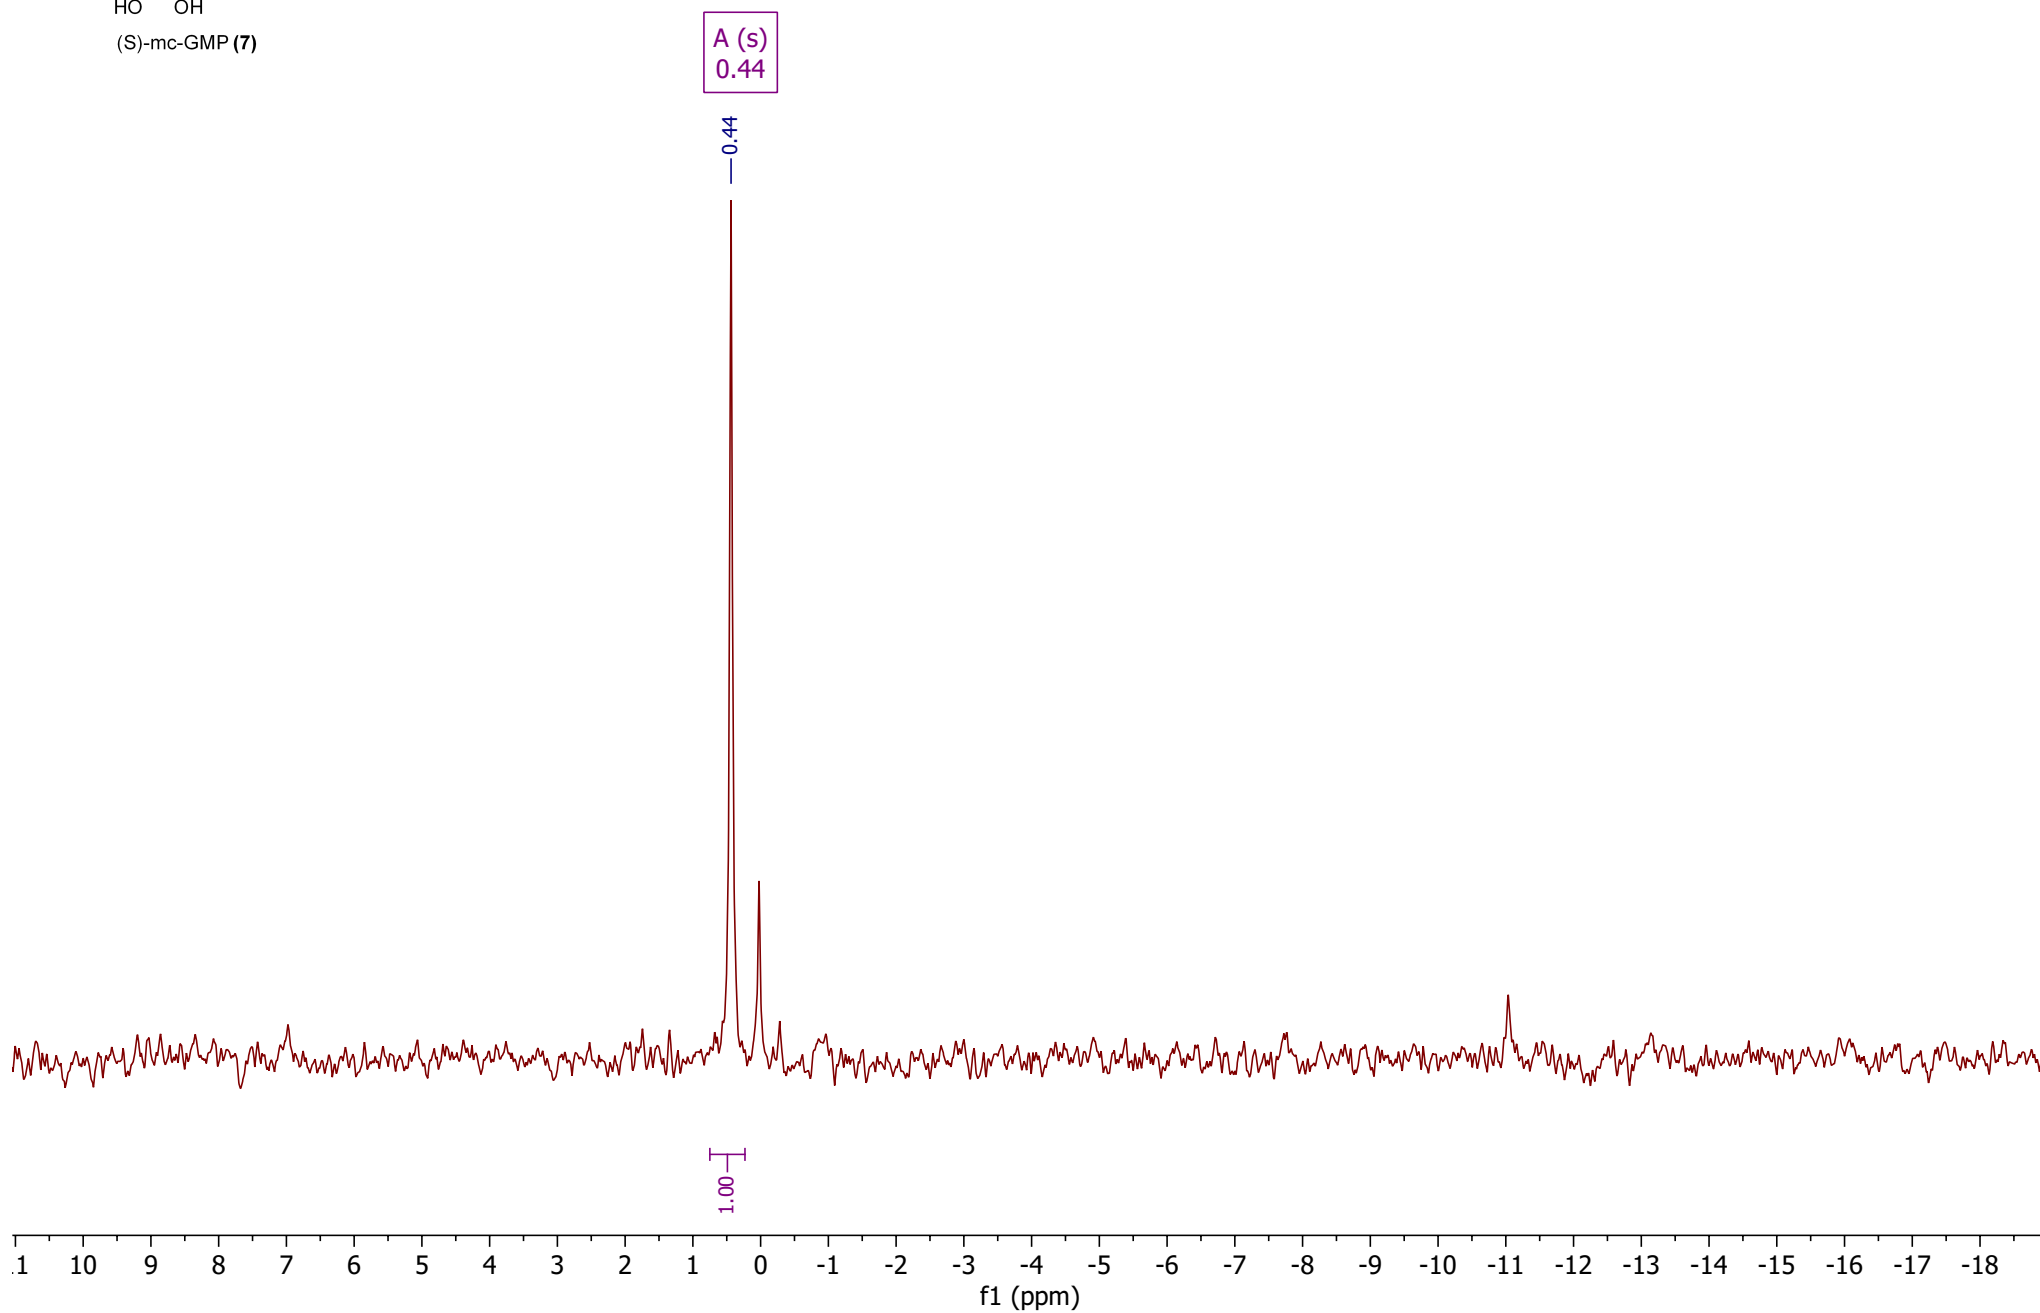



Single Mass Analysis

Tolerance = 5.0 mDa / DBE: min = -1.5, max = 100.0  
Element prediction: Off  
Number of isotope peaks used for i-FIT = 3

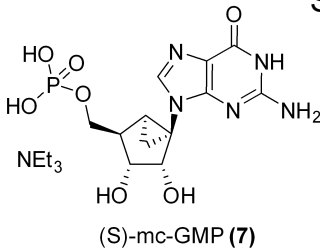

Monoisotopic Mass, Even Electron Ions  
55 formula(e) evaluated with 1 results within limits (up to 50 closest results for each mass)  
Elements Used:  
C: 0-100 H: 0-200 N: 5-5 O: 0-60 P: 1-1  
KST-18MAR19-3-174 66 (1.133) AM2 (Ar,22000.0,0.00,0.00); ABS  
TOF MS ES-

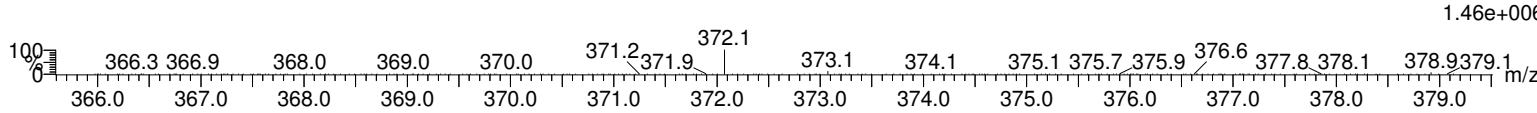

Minimum: -1.5  
Maximum: 5.0 5.0 100.0

| Mass     | Calc. Mass | mDa | PPM | DBE | i-FIT | Norm | Conf (%) | Formula         |
|----------|------------|-----|-----|-----|-------|------|----------|-----------------|
| 372.0716 | 372.0709   | 0.7 | 1.9 | 8.5 | 343.9 | n/a  | n/a      | C12 H15 N5 O7 P |
